1 **Expression of *dlx* genes in the normal and regenerating brain**  
2 **of adult zebrafish.**

3

4 Hellen WEINSCHUTZ MENDES<sup>1\*</sup>, Mariam TAKTEK<sup>1</sup>, Thomas DURET<sup>2</sup> and Marc EKKER<sup>1</sup>

5

6 <sup>1</sup> Department of Biology, University of Ottawa, 20 Marie-Curie Private, Ottawa, ON, Canada

7 <sup>2</sup> Faculté des Sciences Fondamentales et Appliquées, Université de Poitiers, Poitiers 86073,  
8 cedex 09, France

9

10 Corresponding author: [mekker@uottawa.ca](mailto:mekker@uottawa.ca)

11

12

13 \*Current address: Yale Child Study Center, Yale University, 333 Cedar Street, New Haven,  
14 CT, USA.

15

16

17

18

19

20

21

22

## 23 Abstract

24 Dysfunctions in the GABAergic system lead to various pathological conditions and  
25 impaired inhibitory function is one of the causes behind neuropathies characterized  
26 by neuronal hyper excitability. The *Dlx* homeobox genes are involved in the  
27 development of nervous system, neural crest, brachial arches and developing  
28 appendages. *Dlx* genes also take part in neuronal migration and differentiation during  
29 development, more precisely, in the migration and differentiation of GABAergic  
30 neurons. Functional analysis of *dlx* genes has mainly been carried out in developing  
31 zebrafish embryos and larvae; however information regarding the expression and  
32 roles of these genes in the adult zebrafish brain is still lacking. The extensive  
33 neurogenesis that takes place in the brain of adult zebrafish makes them a good  
34 model for the visualization of mechanisms involving *dlx* genes during adulthood in  
35 physiological conditions and during regeneration of the nervous system. We have  
36 identified the adult brain regions where transcripts of *dlx1a*, *dlx2a*, *dlx5a* and *dlx6a*  
37 genes are normally found and have confirmed that within telencephalic domains,  
38 there is high overlapping expression of the four *dlx* paralogs with a marker for  
39 GABAergic neurons. Co-localization analyses carried with the Tg(*dlx6a*-  
40 1.4kb*dlx5a/dlx6a*:GFP) reporter line have also shown that in some areas of the  
41 diencephalon, cells expressing the *dlx5a/6a* bigene may have a neural stem cell  
42 identity by co-localizing with a Sox2 antibody. Furthermore, investigations in a  
43 response to stab wound lesions, have demonstrated a possible participation of the  
44 *dlx5a/6a* bigene, most likely, of *dlx5a* during the regeneration of the adult zebrafish  
45 brain. These data suggest a possible participation of *dlx*-expressing cells during brain  
46 regeneration in adult zebrafish and also provide information on the role of *dlx* genes  
47 under normal physiological conditions in adults.

## 48 Introduction

49 The transcription factors encoded by *Dlx* genes play key roles in the  
50 patterning of the vertebrate limb and the central nervous system (CNS) (1), more  
51 specifically, *Dlx* genes are required in the development of the mammalian brain (2,3).  
52 These genes are required for correct migration and differentiation of progenitors that  
53 will later give rise to GABAergic interneurons (4). *Dlx1<sup>-/-</sup>/Dlx2<sup>-/-</sup>* mutant mice show a  
54 loss of GABAergic interneuron differentiation in the ventral telencephalon, supporting  
55 the notion of this requirement for *Dlx* genes in the differentiation to GABAergic  
56 interneurons (5). In the case of zebrafish, *dlx* genes are also expressed in the  
57 developing brain (6) (7). At 24-48 hours-post-fertilization (hpf), there is partial  
58 overlapping expression of *dlx* and *gad1* genes in the zebrafish forebrain (8).  
59 Nevertheless, information regarding the activity and functions of *Dlx* genes in the  
60 adult brain is still scarce and non-existent in the zebrafish.

61 The majority of vertebrates have six *Dlx* genes which are organized in  
62 convergently transcribed bigene pairs, namely *Dlx1/Dlx2*, *Dlx3/Dlx4* and *Dlx5/Dlx6*  
63 (9) (10) (11). In zebrafish, the *dlx1a/dlx2a* and *dlx5a/dlx6a* (orthologs of mouse  
64 *Dlx1/Dlx2* and *Dlx5/Dlx6*) are expressed in the developing brain. Previously  
65 described cis-regulatory regions are essential for driving the expression of these  
66 bigenes in the brain. The deletion of one of these regions in mice, I56ii, has been  
67 shown to impair the expression of *Dlx* genes and of potential targets including *Gad2*  
68 and other striatal markers (12). The identification of such regulatory elements was a  
69 starting point for the generation of the Tg(*dlx6a*-1.4kb*dlx5a/dlx6a*:GFP) reporter line  
70 that mimics the endogenous expression patterns of *dlx5a/dlx6a* genes in the  
71 forebrain (11,13).

72 Using the Cre/LoxP system for lineage tracing, Solek and collaborators have  
73 reported a detailed analysis of fate decisions for *dlx1a/2a*- and *dlx5a/6a*-expressing  
74 cells. In some instances, labeling larval *dlx5a/6a*-expressing cells, but not *dlx1a/2a*-

75 expressing cells, have resulted in massively expanding, widespread clonal expansion  
76 throughout the adult brain (14). These analyses provided some indications  
77 concerning the role of the progeny of *dlx*-expressing cells in the adult zebrafish brain,  
78 but further analyses are necessary for investigating these *dlx*-expressing cells in the  
79 adult brain.

80 Different investigations have implicated the *dlx* genes in a group of complex  
81 genetic regulatory networks responsible for proper establishment of neuronal  
82 diversity in the CNS during development. Interestingly, the establishment of new  
83 neurons also takes place in the adult zebrafish brain where multiple areas present  
84 constitutive proliferation (15,16). In several mammals and bird species, constitutive  
85 active neurogenic domains are restricted to the forebrain, whereas in the zebrafish,  
86 new neurons are generated in most brain regions throughout adult life (reviewed  
87 (17,18)). High rates of adult neurogenesis are present in thirteen to sixteen distinct  
88 neural stem cell niches along the adult zebrafish brain. The adult zebrafish brain  
89 possesses regeneration capability, which makes this animal an ideal model to study  
90 the mechanisms involved in brain regeneration and the different genes participating  
91 in regeneration responses within the CNS (19) (reviewed in (20,21)). Therefore, a  
92 remarkable capacity to regenerate the CNS following mechanical or chemical insult  
93 is present in the zebrafish (17).

94 The important roles of *dlx* genes during the development and specification of  
95 GABAergic neurons and the potential for regenerative investigations of adult  
96 zebrafish led us to carry investigations on *dlx* paralogs in the adult zebrafish brain. In  
97 this work, we report expression of all four *dlx* paralogs in the adult zebrafish brain  
98 and show that the majority of cells expressing these genes are in fact GABAergic  
99 neurons. Using the previously described transgenic line Tg(*dlx6a*-  
100 1.4kb*dlx5a/dlx6a*:GFP) we carried co-localization analyses which revealed that  
101 *dlx5a/6a*-expressing cells present a neural stem cell identity in specific areas of the

102 forebrain and midbrain of adult zebrafish. Furthermore, during a regeneration  
103 response following stab injury, we observed an up-regulation of *dlx5a* and of the  
104 *dlx5a/6a* bigene.

105

## 106 **Materials and Methods**

107

108 Animal care, husbandry and strains

109

110 All experiments were conducted using protocols approved by the University of  
111 Ottawa Animal Care Committee. Adult zebrafish were housed in circulating water at  
112 28.5C and 14-h light cycle, following standard procedures previously described  
113 (Westerfield, 2000). Zebrafish embryos were obtained from the natural spawning of  
114 adult zebrafish. Facility-raised wild type and adult zebrafish of a reporter line,  
115 Tg(*dlx6a*-1.4kb*dlx5a/dlx6a*:GFP), were used. In this reporter line, the green  
116 fluorescent protein (GFP) is expressed under the control of *cis*-regulatory elements  
117 of the *dlx5a/6a* bigene, namely the I56i and I56ii intergenic region and a 3.5kb  
118 fragment of the *dlx6a* 5'-flanking region (9) (11). In this line the GFP reporter  
119 recapitulates the expression of *dlx5a* and/or *dlx6a* (9,22,23).

120

121 Brain lesions and collection of zebrafish brain tissue.

122

123 Surgeries were performed on adult zebrafish raging from 3mpf to 1ypf as  
124 described by Schmidt (2014) (24). Briefly, after being anesthetized with a 0.4%  
125 Tricaine solution, fish are injured by the insertion of sterile 30g needle directly and

126 vertically through the skull into the medial region of one telencephalic hemisphere  
127 under a dissecting microscope (24). Control specimens are anesthetized, but no  
128 injury is provoked. After surgery, adult zebrafish were maintained under the same  
129 conditions as the rest of the colony. Lesion and control specimens were euthanized  
130 at 3 or 7 days post-lesion (dpl) for analyses.

131 Fish were euthanized by immersion in Tricaine MS-222 solution at 0.8% in  
132 system water, the upper skull was removed and the whole head was fixed in 4%  
133 PFA/PBS overnight at 4 °C. After whole brain was dissected, they were post fixed for  
134 additional 30 min. The tissue was then washed several times with PBS and  
135 equilibrated with 30% sucrose/PBS overnight at 4 °C. Whole brains were then  
136 incubated in a solution of 1:2 30% Sucrose:OCT Compound (Tissue-Tek, VWR  
137 Canada) for 30 min, placed in cryomolds and frozen in liquid nitrogen. Cryosections  
138 of 14-16 µm were obtained with a CM3050S cryostat (Leica, Concord, ON) in  
139 duplicate, triplicate or quadruplicate slides.

140

#### 141 Immunohistochemistry (IHC) and double IHC

142

143 Sections were first rehydrated in PBST (PBS with 0.1% Tween-20), and  
144 blocked in 10% fetal bovine serum in PBST for at least 2 hours at room temperature.  
145 The primary antibodies were used at different dilutions according to the  
146 manufacturer's instructions and optimization of the protocol (Table 1). The primary  
147 antibody incubation was carried out overnight at 4°C in 1% fetal bovine serum in  
148 PBST. Sections were then washed 3 times /15 min with PBST and incubated with the  
149 secondary antibodies for 2 h at room temperature (Table 1). Sections were again  
150 washed with PBST and nuclei visualized with DAPI (Life Technologies, Burlington,  
151 ON). The Calbindin, Calretinin, PCNA and TH antibodies required an extra step of

152 antigen retrieval. Sections were treated for 20 min at 85 °C in 0.01 M sodium  
153 citrate/0.05% Tween-20 solution and cooled down to RT for 15 minutes prior to  
154 blocking. Images were acquired with either a Nikon A1 Confocal microscope or a  
155 Zeiss AxioPhot Fluorescence Microscope and treated with NIS-Elements Advanced  
156 Research Software or ImageJ.

157

## 158 Riboprobes and In-situ hybridization (ISH)

159

160 Expression of *dlx1a*, *dlx2a*, *dlx5a*, *dlx6a* and *gad65* was determined using In  
161 situ hybridization assays with antisense mRNA probes on crysections as described  
162 (Dorsky et al., 1995). Antisense mRNA probes were labeled with digoxigenin-dNTP  
163 or dinitrophenol DNP-11-UTP and synthesized from cDNA clones, *dlx1a* (Ellies et al.,  
164 1997), *dlx2a* and *dlx5a* (Akimenko et al., 1994), *dlx6a* (Ellies et al., 1997) and *gad65*  
165 (Martin 1998). Vectors containing the cDNA clones were linearized with *Bam*HI,  
166 *Eco*RI or *Xho*I and the antisense riboprobes were synthesized using either the T7 or  
167 T3 polymerase as required.

168 Brain sections, stored at -20°C, were thawed at room temperature for 30  
169 minutes before the experiment. Hybridization was carried out overnight at 70°C in a  
170 humidified chamber. Slides were washed twice with Solution A (50% Formamide, 5%  
171 20x SSC in dH<sub>2</sub>O) and twice with TBS. Blocking with 10% FBS TBST was carried for  
172 2 hours in RT. Detection of hybridized probes was performed with anti-DIG  
173 antibodies AP fragments (Roche, Basel Switzerland; dilution 1:1000) overnight at  
174 4°C. After four TBST washes, staining was developed with NBT/BCIP for 6–18h  
175 (Sigma, St-Louis, MO). Images were acquired with a Zeiss AxioPhot Fluorescence  
176 Microscope.

177

178 Double Fluorescent In-situ Hybridization (dbIFISH)

179

180 Sections were treated with 2% H<sub>2</sub>O<sub>2</sub> in PBS to inactivate endogenous  
181 peroxidase followed by incubation with anti-DIG antibodies POD fragments in  
182 combination with anti-DNP POD (Roche, Basel Switzerland; dilution 1:1000).  
183 Incubations with these antibodies were done separately at 4°C, overnight, for each of  
184 the antibodies. Staining with tyramide Cy3 solution or Fluorescein in PBS/Tween  
185 (1:100) was carried for 10 min each (Perkin-Elmer, Woodbridge, Ontario). Images  
186 were acquired with a Nikon A1 confocal microscope and/or Zeiss AxioPhot  
187 Fluorescence Microscope and treated with NIS-Elements Advanced Research  
188 Software or ImageJ.

189

190 RNA extraction, cDNA synthesis and qRT-PCR

191

192 Quantification of *dlx1a*, *dlx2a*, *dlx5a* and *dlx6a* RNA transcripts within brain  
193 tissues, was performed on a BioRad CFX96 quantitative Reverse Transcription PCR  
194 detection system using SsoFast EvaGreen (BioRad) fluorescent dye supermix and  
195 specific primers for each gene (Supp Table 1). Primers were designed in separate  
196 exon sequences using NCBI's Primer-BLAST Program (Primer-Blast, National  
197 Center for Biotechnology Information, National Library of Medicine, Bethesda, MD)  
198 ensuring products were free of primer dimers.

199 Total RNA was extracted from the dissected and isolated forebrain of each  
200 adult fish using homogenization with TriZol (Ambion) according to manufacturer  
201 protocol. Concentration of extracted RNA was obtained using NanoDrop 2000  
202 (Thermo Scientific). Synthesis of cDNA was accomplished by reverse transcription of  
203 total RNA. From control and lesion specimens 500ng of total RNA were reverse



204 transcribed using the Quantitect reverse transcription kit (Qiagen). Quality and purity  
205 of cDNAs was confirmed by Agarose gel Electrophoresis. In order to assay  
206 transcripts of genes of interests by qPCR, the following conditions were used: 95°C  
207 for 30s, followed by 40 cycles of 95°C for 5s and 59°C for 5s, then a melt curve  
208 progressing from 65°C to 95°C, at 5s per 0.5°C increase. Two reference genes were  
209 used for each qPCR either *ef1a*, *ywhaz* or *rpl13a*. Data were analyzed using  
210 CFXManager (Bio-Rad) and compiled using GraphPad PRISM.

211

212 Statistical analyses

213

214 Statistical comparison of two groups (lesion and controls) for GFP cell  
215 counting values and qRT-PCR results was conducted using an unpaired t-test using  
216 GraphPad PRISM. An alpha-value of 0.05 was defined as statistically significant. For  
217 \*  $p \leq 0.05$  and n.s. = not significant  $p > 0.05$ . Error bars represent standard error on  
218 the mean (SEM). Cell counts were performed on a minimum of two individuals in a  
219 blinded fashion to eliminate researcher bias.

220

## 221 Results

222 *dlx1a*, *dlx2a*, *dlx5a* and *dlx6a* are expressed in the adult zebrafish brain.

223

224 Expression of *dlx* genes in the zebrafish brain has been reported during  
225 development (6,7,13,22), but information on the expression of such genes in adult  
226 zebrafish was still lacking. To determine if *dlx1a*, *dlx2a*, *dlx5a* and *dlx6a* are

227 expressed in the adult zebrafish brain, we performed ISH assays in adults ranging  
228 from 3mpf to 18mpf.

229 Consistent with previous observations in embryos and larvae, the expression  
230 of all four *dlx* paralogs was abundant in ventral regions of the forebrain. Transcripts  
231 of *dlx1a*, *dlx2a*, *dlx5a* and *dlx6a* were present especially in the dorsal, ventral and  
232 postcommissural nucleus of the ventral telencephalic area (Vd, Vv and Vp) (Fig 1B -  
233 B'''). For *dlx2a* and *dlx5a*, expression was also found within the central nucleus of the  
234 ventral telencephalic area (Vc). The anterior part of the parvocellular preoptic  
235 nucleus (PPa) was observed to be one of the regions with the most abundant  
236 expression of all four *dlx* genes in the adult zebrafish brain (Fig 1C-C'''). In the  
237 midbrain, the caudal and dorsal zones of the periventricular hypothalamus (Hc and  
238 Hd) revealed abundant expression of all four *dlx* genes (Fig 1D-D'''). The expression  
239 of *dlx* genes was consistent and similar among the four different paralogs as well as  
240 among different stages of the adult zebrafish, ranging from 3mpf to 18mpf (N=8 for  
241 each gene), therefore not presenting an age-dependent variation during adulthood.

242

243

244 **Fig 1. *dlx1a*, *dlx2a*, *dlx5a* and *dlx6a* are expressed in the adult zebrafish brain.**

245 Schematic representation of sections depicted in the top right panel. *In situ*  
246 hybridization shows *dlx* expression in cryosections of the adult zebrafish brain.  
247 Sagittal section showing *dlx5a* expression in a 1ypf fish (A). Transverse sections  
248 showing expression throughout areas of the forebrain, midbrain and hindbrain of  
249 *dlx1a* (B-D), *dlx2a* (B'-D'), *dlx5a* (B''-D'') and *dlx6a* (B'''-D''') in 1 ypf zebrafish (N=6  
250 for each *dlx* gene).

251 Scale bar (A): 1mm; (B-D''') : 400µm

252

253

254           Our observations also reveal that all four *dlx* paralogs are expressed in  
255 almost all niches which present constitutive proliferation in the adult zebrafish brain,  
256 providing the first suggestions that these genes may participate in constitutive  
257 proliferation (Supp Fig1). Although the expression of *dlx1a*, *dlx2a*, *dlx5a* and *dlx6a*  
258 was observed to be highly overlapping in the adult zebrafish brain, we cannot  
259 conclude from our results if the different *dlx* paralogs are co-expressed within the  
260 same individual cells.

261

262 GABAergic neurons identity for *dlx*-expressing cells in the adult zebrafish  
263 brain.

264           To determine the identity of cells expressing *dlx1a*, *dlx2a*, *dlx5a* and *dlx6a* in  
265 the adult zebrafish brain, we performed co-localization analyses using double  
266 fluorescence *in situ* hybridization (ISH) and double immunohistochemistry assays.  
267 Based on the relationship between *dlx* and *gad1* expression as well as on the  
268 regulatory roles for *dlx* genes in GABAergic neuron development, we first wanted to  
269 analyze if *dlx*-expressing cells could have a GABAergic interneuron identity. Double  
270 fluorescence ISH assays were performed combining a mRNA probe recognizing one  
271 of the four *dlx* paralogs with *gad65*, a gene encoding an enzyme that catalyzes the  
272 decarboxylation of glutamate to GABA.

273           Widespread co-expression of *dlx* genes and *gad65* was observed throughout  
274 the adult zebrafish forebrain. The majority of *dlx2* and *dlx5a*-expressing cells co-  
275 expressed *gad65* in the medial zone of the dorsal telencephalic area (Dm), dorsal  
276 nucleus of ventral telencephalic area (Vd), postcommissural nucleus of ventral  
277 telencephalic area (Vp), parvocellular preoptic nucleus, anterior part (PPa) and  
278 posterior part of parvocellular preoptic nucleus (PPp) (Fig 2I-L) (N=4 for *dlx2a* and

279 *dlx5a*). Similar observations were obtained for *dlx1a* and *dlx6a* (data not shown). In  
280 the midbrain, co-expression of *gad65* and *dlx1a*, *dlx2a*, *dlx5a* and *dlx6a* was less  
281 prevalent compared to areas of the forebrain. In the ventral zone of the  
282 periventricular hypothalamus (Hv) and dorsal zone of the periventricular  
283 hypothalamus (Hd), only a small portion of *dlx*-expressing cells presented a  
284 GABAergic interneuron identity (Supplementary Fig 2).

285

286 **Fig 2. Co-expression of *dlx* paralogs with markers of GABAergic neurons in**  
287 **adult zebrafish.**

288 Double fluorescence ISH of transverse sections of the forebrain showing expression  
289 of *dlx2a* (A-B) and *dlx5a* (C-D) in green and expression of *gad65* in red (E-H).  
290 Anatomical parts indicated. Merged images showing co-localization of *dlx* and *gad65*  
291 in yellow [I-L] (N=4 for *dlx2a* and *dlx5a*). Double IHC with *Tg(dlx6a-*  
292 *1.4kbdlx5a/6a:GFP)* and Calretinin or Calbindin shows co-localization, indicated by  
293 white arrows [N-P] (N=6 for Calbindin and Calretinin). Merged images were created  
294 with ImageJ(32) software. Calret.: Calretinin and Calb.: Calbindin. Dm.: medial zone  
295 of dorsal telencephalic area; PGZ.: periventricular gray zone; PPa.: anterior part of  
296 parvocellular preoptic nucleus; PPs.: posterior part of parvocellular preoptic nucleus;  
297 V.: ventral telencephalic area; Vd.: dorsal nucleus of V.; Vp.: parvocellular nucleus of  
298 V.; Vs.: supracommissural nucleus of V.; Vv.: ventral nucleus of V.

299 Scale bar: 400µm

300

301 As there is absence of good antibodies that recognize the *Dlx* proteins in  
302 zebrafish, the *Tg(dlx6a-1.4kbdlx5a/6a:GFP)* line allowed us to better investigate co-  
303 localization and quantifications of *dlx5a/6a*-expressing cells. Even though all  
304 GABAergic neurons present inhibitory functions, these neurons can be

305 morphologically, electrically and chemically heterogeneous, and there are several  
306 subtypes of GABAergic neurons in the CNS. Using *Tg(dlx6a-1.4kbdlx5a/6a:GFP)*  
307 adult fish, we investigated if *dlx5a/6a*-expressing cells could be specifically labeled to  
308 some of the subtypes of GABAergic interneurons, namely: calbindin and calretinin.  
309 Similar to observations at developmental stages, our analyses indicate that, with a  
310 few exceptions, the majority of *dlx5a/6a*-expressing cells do not co-localize with  
311 these specific subtype markers (Fig. 16). Co-labeling with calretinin has shown very  
312 little if any co-localization with GFP. Only a few *dlx5a/6a*-expressing cells appear to  
313 be calretinin neurons in the periventricular gray zone (PGZ) (Fig 2M-N). In fact, within  
314 the PGZ area, a few *dlx5a/6a*-expressing cells have also shown a calbindin identity.

315 Interestingly and in contrast to observations at developmental stages, in the  
316 adult zebrafish brain, we observed many *dlx5a/6a*-expressing cells co-localizing with  
317 calbindin within the supracommissural nucleus of the ventral telencephalic area (Vs)  
318 and within the anterior and posterior part of parvocellular preoptic nucleus (PPa and  
319 PPp) in the diencephalon (Fig 2O-P). A few GFP positive cells also co-express  
320 calbindin within the dorsal and ventral nucleus of the ventral telencephalic area (Vd  
321 and Vv). No co-localization was observed in areas of the hypothalamus.

322

323 Neural stem cells, but not proliferating or glial cells, express *dlx5a/6a* in areas  
324 of the adult zebrafish brain

325

326 As the *dlx* genes might be implicated in promoting neuronal proliferation (25)  
327 (26), we sought to investigate if neural stem cells (NSCs) could also express *dlx*  
328 genes. Our results indicate that cells expressing *dlx5a/6a* co-localized with the sex-  
329 determining 2 (Sox2) marker in some areas of the adult zebrafish brain, while cells  
330 expressing GFP and Sox2 were adjacent in others. The following areas of the

331 forebrain presented a small percentage of co-localization of the two markers: the  
332 medial dorsal telencephalic area (Dm) in the dorsal and ventral nucleus of the ventral  
333 telencephalic area (Vd and Vv). Within the supracommissural nucleus of the ventral  
334 telencephalic area (Vs), we observed a higher percentage of co-localization than in  
335 the domains of the telencephalon as mentioned before (Fig 3).

336

337

338 **Fig 3. Co-localization of GFP and Sox2 in the *Tg(dlx6a-1.4kbdlx5a/6a:GFP)***  
339 **adult zebrafish brain.**

340 Double IHC with *Tg(dlx6a-1.4kbdlx5a/6a:GFP)* and Sox2 shows co-localization,  
341 indicated by white arrows, in merged images of GFP and Sox2 (C-F) (N=8). Merged  
342 images were created with ImageJ(32) software. Hc.: caudal hypothalamus; Hd.:  
343 dorsal zone of periventricular hypothalamus; PPa.: anterior part of parvocellular  
344 preoptic nucleus; Sc.: suprachiasmatic nucleus; Vd.: dorsal nucleus of V.

345 Scale bar: 400µm

346

347

348 The anterior part of the parvocellular preoptic nucleus (PPa), within the  
349 diencephalon, was one of the areas with high co-localization of *dlx5a/6a*-expressing  
350 cells and Sox2 expression. The more rostral portions of the dorsal and ventral  
351 hypothalamus presented some co-localization of GFP and Sox2, and the most  
352 caudal portions of the hypothalamus also seemed to reveal a high percentage of  
353 GFP and Sox2 co-localization (Fig 3C, E-F).

354 These data suggest that, in some areas of the adult zebrafish brain, a number  
355 of *dlx5a/6a*-expressing cells present a neural stem cell identity, especially in the PPa

356 and the hypothalamus, two areas where expression of all four *dlx* paralogs is very  
357 abundant. Giving the overlapping expression within these areas, these *dlx5a/6a*-  
358 expressing cells might have a role in promoting neural proliferation during adulthood  
359 in the zebrafish brain. In all other areas of the adult zebrafish not mentioned before,  
360 the great majority of *dlx5a/6a*-expressing cells did not co-localize with Sox2 (data not  
361 shown). The adjacent expression of *dlx5a/6a* to Sox2, clearly observed in Hd for  
362 example (Fig 3C), also suggest that many *dlx*-expressing cells have already reached  
363 a more differentiated state.

364 We also examined if *Tg(dlx6a-1.4kbdlx5a/6a:GFP)*-expressing cells could  
365 represent either glia populations or proliferating cells. We observed rare, if any, co-  
366 localization of GFP with glial fibrillary acidic protein (GFAP) or with the proliferating  
367 cell nuclear antigen (PCNA) (Fig 4A-H), giving indications that in the adult zebrafish  
368 brain, *dlx5a/6a*-expressing cells might not have a proliferating or glial cell identity.

369

370 **Fig 4. Immunohistochemical labeling of PCNA, GFAP and TH in *Tg(dlx6a-***  
371 ***1.4kbdlx5a/6a:GFP)* adult zebrafish.**

372 Double IHC with *Tg(dlx6a-1.4kbdlx5a/6a:GFP)* in combination with either PCNA,  
373 GFAP or TH. Labeling of GFP with PCNA (A-D) and GFAP (E-H), shows no co-  
374 localization of the two markers with GFP (N=6). Labeling of GFP and TH (I-L) shows  
375 a few co-localizations of the two markers, indicated by white arrows. Merged images  
376 created with NIS-Elements Advanced Research Software.

377 Scale bar: 200µm

378

379 A few studies have suggested a possible role for *dlx* genes in dopaminergic  
380 subtype specification and regulation (27) (28). Additionally, some evidence indicates  
381 co-expression of markers for GABAergic neurons and tyrosine hydroxylase (TH), an

382 enzyme that catalyzes the first reaction in dopamine biosynthesis(29). We sought to  
 383 investigate if, in the adult *Tg(dlx6a-1.4kbdlx5a/6a:GFP)* zebrafish brain, there was  
 384 co-localization of GFP and TH. Once again, results show rare instances of a few  
 385 single cells co-expressing GFP and TH in the ventral telencephalic area and in the  
 386 caudal zone of the hypothalamus (Hc) (Fig 4I-L).

387 Taken together, these co-localization observations reveal that in the adult  
 388 zebrafish brain, the majority of *dlx*-expressing cells seem to have a GABAergic  
 389 neuronal identity. The results are summarized on Table 1.

390

391 TABLE 1. Co-localization of *dlx* genes and different markers.

| Brain areas/ Markers           | gad65a <sup>+</sup> | Calbindin <sup>*</sup> | Calretinin <sup>*</sup> | TH <sup>*</sup> | Sox2 <sup>*</sup> | GFAP <sup>*</sup> | PCNA <sup>*</sup> |
|--------------------------------|---------------------|------------------------|-------------------------|-----------------|-------------------|-------------------|-------------------|
| Ventral<br>Telencephalon       | +++                 | +                      | -                       | +               | -                 | +                 | +                 |
| Dorsal<br>Telencephalon        | +++                 | +                      | -                       | -               | +                 | -                 | -                 |
| Preoptic Area                  | ++                  | ++                     | +                       | -               | +++               | -                 | -                 |
| Periventricular gray<br>zone   | n.c.                | +                      | +                       | -               | +                 | -                 | -                 |
| Caudal zone of<br>Hypothalamus | +                   | -                      | -                       | +               | +++               | -                 | -                 |
| Dorsal zone of<br>Hypothalamus | +                   | -                      | -                       | -               | -                 | -                 | -                 |

392 n.c.: Not conclusive



393 - no co-localization observed

394 + very scarce co-localization (1 – 15% of cells present co-localization)

395 ++ 15% to 50% of cells present co-localization

396 +++ Over 50% of cells present co-localization

397

398 *dlx5a* and *dlx5a/6a* are up-regulated during brain regeneration following stab  
399 wound lesion.

400 The *dlx* genes are required during development for proper establishment of  
401 neuronal populations in the central nervous system. The zebrafish brain presents  
402 high levels of adult neurogenesis and regeneration, as previously mentioned.  
403 Therefore, we explored a possible participation of *dlx* paralogs in adult brain  
404 regeneration. In order to address this, we have used mechanical stab lesions in the  
405 telencephalon, an area with both high rates of constitutive proliferation and high  
406 expression of all four *dlx* genes.

407 We analyzed the expression of *dlx1a*, *dlx2a*, *dlx5a* and *dlx6a* by *in situ*  
408 hybridization at 7 days-post-lesion(dpl) (3mpf to 1ypf). This time point presents a  
409 very important stage of the regeneration response and the peak of constitutive  
410 proliferation after a lesion (17). The spatial distribution of *dlx1a*, *dlx2a*, *dlx5a* and  
411 *dlx6a* transcripts remained similar during the regeneration response, with expression  
412 concentrated in the dorsal (Vd) and ventral (Vv) nucleus of the ventral telencephalon  
413 in the sections analysed (Fig 5F-I).

414

415

416

417 **Fig 5. Expression of *dlx1a*, *dlx2a*, *dlx5a* and *dlx6a* post-lesion in adult**  
418 **zebrafish.**

419 Top left panel (A) shows the location of the mechanical lesion. Expression of the four  
420 *dlx* paralogs in controls (B-E) and lesioned brains (F-I). A slight up-regulation of *dlx2a*  
421 and *dlx5a* was apparent compared to controls (G and H). N=6 for each gene (2  
422 biological replicates in 3 different experiments). RT-qPCR analyses with RNA  
423 extracted from the telencephalon of regenerating brains at 7dpl and control  
424 specimens (J). No significant changes in expression levels of *dlx1a*, *dlx2a* and *dlx6a*  
425 were observed (N=7 for each gene each). A significant increase in *dlx5a* expression  
426 was observed at 7dpl (*Student's t-test*, n=7, p=0.008).

427 Scale bar: 400  $\mu$ M

428

429

430 A slight up-regulation of *dlx5a* at 7dpl was suggested based on the intensity  
431 of the ISH signal (Fig 5H). At this time point, expression of *dlx5a* consistently  
432 presented slight increases and a more widespread expression pattern within the  
433 dorsal telencephalic area. Overall, expression of all four paralogs is very weak in the  
434 dorsal telencephalon and ventricular zone of the telencephalon. This increase was  
435 verified by experimental repetition and biologic replicates (n= 6 for each *dlx* gene).

436 We did not observe apparent changes in the expression of *dlx1a*, *dlx2a* or  
437 *dlx6a* at 7dpl (Fig 5J), nor in the expression patterns of *dlx1a*, *dlx2a*, *dlx5a* or *dlx6a* at  
438 the site of injury where the needle was inserted in the ventricle of telencephalon at  
439 7dpl.

440 Possible changes in expression levels of *dlx1a*, *dlx2a*, *dlx5a* and *dlx6a* were  
441 further quantified by qRT-PCR at 7dpl. Slight increases in *dlx1a*, *dlx2a* and *dlx6a*  
442 transcripts were seen but did not reach statistical significance at 7dpl. However,

443 there was a significant increase in *dlx5a* expression in the telencephalon of lesioned  
444 adult zebrafish at 7dpl (Fig.5 J).

445 Changes in *dlx* expression during brain regeneration was further examined  
446 using the *Tg(dlx6a-1.4kbdlx5a/6a:GFP)* reporter line and direct counting of GFP  
447 positive cells. The dorsal and ventral areas of the ventral telencephalon is where  
448 constitutive proliferation takes place and are also the regions were an increase  
449 seemed more visible, therefore this area was selected for quantification (Fig.6). Cell  
450 counting revealed an increase in the number of GFP-expressing cells in the ventral  
451 portions of the telencephalon of regenerating brains of adults (9mpf) at 3 dpl  
452 (average 266 [180-384] vs. 233 [99-396] in controls, N=6) and 7pl (average 344 [244-  
453 408] vs. 247 [198-302] in controls, N=6). At 3 dpl, this increase was not significant  
454 (*Student's t-test*,  $p=0.613$  Fig. 25.F), while at 7dpl this number reached statistical  
455 significance (*Student's t-test*,  $p=0.008$  Fig. 6.F).

456

457 **Fig 6. GFP labeling in *Tg(dlx6a-1.4kbdlx5a/6a:GFP)* adult zebrafish at 7 days**  
458 **post-lesion and cell quantification.**

459 Expression of GFP in *Tg(dlx6a-1.4kbdlx5a/6a:GFP)* determined with a GFP antibody  
460 in controls (A and C) and regenerating brains at 3 dpl (B) and 7dpl (D). Schematic  
461 representation of the telencephalon where lesion is inflicted and areas used for cell  
462 counting of all GFP-positive cells (E) (area indicated by blue arrows bellow blue  
463 lines). Quantification of GFP+ cells in the regenerating brain at 3dpl and 7dpl  
464 ( $P=0.008$ ,  $N=6$ ) (F).

465 Scale bar: 400  $\mu$ m

466

467 These data suggest that, at 7 dpl, a time when the regeneration response is  
468 pronounced in the adult zebrafish brain, the *dlx5a/6a* bigene, possibly the *dlx5a*

469 gene, may participate in and reflect an increased proliferation within the ventral area  
470 of the ventricle of the telencephalon.

## 471 **Discussion**

472 The observations presented here expand our current understanding of *dlx*  
473 function from the context of development to adulthood in zebrafish. Here, we report  
474 the expression of *dlx* genes in the adult zebrafish brain, characterize the GABAergic  
475 and NSCs identity of cells expressing *dlx* in adults, and verify the expression of these  
476 genes, particularly of *dlx5a* and *dlx5a/6a*, during regeneration in a post-injury  
477 response.

478 The first observations of *dlx1a*, *dlx2a* and *dlx5a* expression in the zebrafish  
479 developing brain indicated the onset of expression at around 13h hours-post-  
480 fertilization (6) (7). The expression of the four paralogs *dlx1a*, *dlx2a*, *dlx5a* and *dlx6a*,  
481 is present throughout embryonic and larval stages as demonstrated by others (11)  
482 (22) (30). In adults, we observed that *dlx1a*, *dlx2a*, *dlx5a* and *dlx6a* are expressed  
483 similarly among the four different paralogs and independently of adult stages ranging  
484 from 3mpf to 18mpf.

485 In the forebrain, the domains of *dlx1a*, *dlx2a*, *dlx5a* and *dlx6a* expression,  
486 namely the dorsal, ventral and parvocellular nucleus of ventral telencephalic area  
487 and diencephalon, remained consistent with observations made during embryonic  
488 development. Transcripts of *dlx2a* and *dlx5a* were also observed within the central  
489 nucleus of the ventral telencephalic area (Vc). In fact, in many areas, *dlx2a* and *dlx5a*  
490 expression was seemingly more abundant than *dlx1a* and *dlx6a*. This was not  
491 unexpected as, in embryos, the intensity of the *dlx5a* ISH signal was comparatively  
492 more uniform and stronger than that of *dlx6a* (7). However, we do not rule out the  
493 possibility of the results obtained here being due to less effective hybridization of  
494 mRNA probes utilized for *dlx1a* and *dlx6a* in ISH assays. In contrast to what was

495 observed in the diencephalon of embryos, the anterior and posterior part of  
496 parvocellular preoptic nucleus were regions with abundant expression of all four *dlx*  
497 genes in the adult zebrafish brain. Yet, other domains of the diencephalon such as  
498 the hypothalamus, caudal and dorsal hypothalamus, presented abundant expression  
499 of *dlx1a*, *dlx2a*, *dlx5a* and *dlx6a* genes. The spatiotemporal expression of *dlx* genes  
500 in the adult brain could be indicative of multiple roles, ranging from cell fate  
501 determination to neurogenesis. In fact, many of the adult zebrafish brain regions  
502 where *dlx1a*, *dlx2a*, *dlx5a* and *dlx6a* are expressed consist of neurogenic zones (sup  
503 fig) (21).

504         Given previous observations of the participation of *dlx* genes in GABAergic  
505 interneuron specification (2) (8), we expected that in the adult zebrafish brain, many  
506 *dlx*-expressing cells would have a GABAergic neuronal identity. Indeed, our  
507 observations revealed that, in telencephalic regions, there is a high overlapping  
508 expression of *dlx* and *gad65* transcripts, indicating that the great majority of *dlx*-  
509 expressing cells consist of GABAergic neurons in these areas. In the diencephalon,  
510 however, at the ventral and dorsal zone of the periventricular hypothalamus (Hd and  
511 Hv), only a small portion of *dlx*-expressing cells presented a GABAergic interneuron  
512 identity (sup figure). This might indicate that, in these areas, those cells are in the cell  
513 cycle and have not yet acquired the GABAergic phenotype, or that *dlx*-expressing  
514 cells will give rise to different identities.

515         The calcium binding proteins calretinin and calbindin are expressed in  
516 GABAergic and glutamatergic cortical neurons (31). *Dlx* enhancers in mice have  
517 been shown to be highly active in some of the major subtypes of GABAergic  
518 interneurons (32). Interestingly, during the early development of zebrafish, the  
519 comparison of GFP expression in *Tg(dlx6a-1.4kbdlx5a/6a:GFP)* embryos with  
520 markers for GABAergic subtypes, revealed that a vast majority of GFP-positive cells  
521 within the telencephalon and diencephalon of 3 dpf embryos do not co-localize with

522 any of these markers (22). Similar to what was observed during development, our  
523 results indicate that the majority of *dlx5a/6a*-expressing cells do not co-localize with  
524 these specific subtypes in the adult zebrafish brain, with some exceptions. However,  
525 the anterior and posterior part of parvocellular preoptic nucleus as well as the  
526 supracommissural nucleus of ventral telencephalic area presented cluster of cells  
527 with high co-localization of GFP and Calbindin, suggesting that *dlx5a/6a* is highly  
528 active in Calbindin interneurons in these regions.

529         Apart from their known role in GABAergic neurons specification, the *dlx*  
530 genes can be considered pro-neural transcription factors known to promote neural  
531 proliferation (26). Our results revealed that cells expressing *dlx5a/6a* genes do not  
532 seem to have a glial or proliferating cell identity in the adult brain as no co-  
533 localization was observed with GFAP or PCNA markers. Interestingly, in some areas  
534 of the forebrain and midbrain, particularly in the anterior part of parvocellular preoptic  
535 nucleus, the supracommissural nucleus of ventral telencephalic area and caudal  
536 hypothalamus we observed high overlapping co-localization of the neural stem cell  
537 marker Sox2 and GFP in the brain of *Tg(dlx6a-1.4kbdlx5a/6a:GFP)* adults. These  
538 observations suggest a role for *dlx* genes in the maintenance of neural pluripotency  
539 or in promoting neural proliferation in the adult brain.

540         We frequently observed marker co-localization in the telencephalon and  
541 diencephalon that differed from that observed within the hypothalamus domains of  
542 the adult zebrafish brain. The hypothalamus is involved in the regulation of body  
543 temperature and reproduction and can be considered a central interface in which  
544 neuronal, hormonal and vascular systems are connected (33). Other transcription  
545 factors have been implicated in neuronal specification within the hypothalamus of the  
546 zebrafish (34). Certain areas of the hypothalamus, especially in the caudal and  
547 dorsal hypothalamus (Hc and Hd, respectively), presented very little co-localization of  
548 *dlx* transcripts and *gad65* (Suppl. Fig.2). It was also within the Hc that the highest

549 overlapping expression levels of *dlx* genes and Sox2 were observed, as well as a  
550 few occasions of co-localization of TH and GFP with *Tg(dlx6a-1.4kbdlx5a/6a:GFP)*  
551 adult zebrafish. While co-localization of Sox2 and *dlx5a/6a* was abundant in the Hc,  
552 the expression of these genes was observed in adjacent patterns in the Hd. This  
553 suggests that while in some areas of the hypothalamus these genes may be involved  
554 with the reprogramming of cells to become mature neurons, in other areas of the  
555 hypothalamus, *dlx* transcripts may be present in recently formed mature neurons that  
556 do not have a GABAergic identity.

557         Due to the intense reactive proliferation in the brain during regeneration  
558 (16,17), we expected to see changes in the patterns of expression of *dlx1a*, *dlx2a*,  
559 *dlx5a* and *dlx6a*, as these genes take part in important developmental events and  
560 neuronal specification. We observed a slightly stronger ISH staining expression of  
561 *dlx2a* and *dlx5a* in the telencephalon of regenerating brain at 7dpl. This time point is  
562 thought to represent a very important stage of the regeneration response and the  
563 peak of constitutive proliferation after mechanical lesion (24) (35). The expression of  
564 *dlx5a* appeared to be particularly stronger within the the dorsal and parvocellular  
565 nucleus of ventral telencephalic area, and this gene showed more widespread  
566 expression patterns within the dorsal telencephalic area. Although these increases  
567 were observed for *dlx2a* and *dlx5a*, in both cases, the presence of transcripts was  
568 not found adjacent or exactly at the location of injury at the ventricular zone.

569         Counting of GFP positive cells with the *Tg(dlx6a-1.4kbdlx5a/6a:GFP)* reporter  
570 line revealed a significant increase in *dlx5a/6a*-expressing cells in specific areas of  
571 the telencephalon at 7dpl. In this reporter line it is not fully known if the GFP reporter  
572 recapitulates the expression of *dlx5a* and *dlx6a* equally, additionally, there is an  
573 increased sensitivity of the GFP reporter and easier detection than mRNA transcripts  
574 with ISH (36). RNA quantification analyses of the telencephalon of lesioned adult  
575 zebrafish corroborate the results observed by ISH. Slight increases in *dlx1a*, *dlx2a*

576 and *dlx6a* transcript levels were observed at 7dpi and statistically significant  
577 increases were obtained for *dlx5a*. These results suggest that *dlx* genes may  
578 participate in post-injury response. Thus, increased expression of these genes may  
579 participate in compensating for neuronal loss, specifically the loss of GABAergic  
580 neurons.

581         The events subsequent to a traumatic lesion in the CNS can lead to an  
582 increase in neurogenesis depending mainly on three aspects: the severity of the  
583 lesion, the site of the trauma, and the competency of the progenitor cells (21,37,38)  
584 .The adult mammalian brain harbours neural precursor cells (NSCs), which are a  
585 potential source of neurons for repairing injured brain tissue. Recent studies show  
586 that the telencephalic ventricular zone in the adult zebrafish brain, where the dorsal  
587 and ventral nucleus of ventral telencephalic area are located, contain NPCs that  
588 share characteristics with the NPCs in the mammalian SVZ (20) (39) (40) (41). The  
589 results obtained here reveal potential roles for the *dlx* genes in a regeneration  
590 response towards reappearing injured brain tissue.

591         Given the important roles already described for *dlx* genes in the CNS during  
592 development, the work presented here expands our knowledge of *dlx* genes function  
593 to the context of adulthood. Understanding the role of transcription factors in the  
594 adult CNS as well as the mechanisms involved in regeneration biology of the  
595 vertebrate CNS present great potentials for therapies, especially regarding human  
596 neurodegenerative disorders or acute neural injuries.

597

598

## 599 **Supplementary Information**

600



601 **Supplementary Table 1. Primers used for qRT-PCR.**

| Gene of interest | Forward primer           | Reverse primer                    | Fragment size |
|------------------|--------------------------|-----------------------------------|---------------|
| <i>dlx1a</i>     | CAACTCGGTCGGTAGCCATT     | GCTTGCGGATCTTTTTGCCT              | 176 bp        |
| <i>dlx2a</i>     | GAAACGCTTTCGGCCCCTA      | CCATTTCGGATTCAGGTTTCGC            | 96 bp         |
| <i>dlx5a</i>     | GGCTCATACTCCACAGCGTA     | CATCCTTACTTCGGGCTCGG              | 105 bp        |
| <i>dlx6a</i>     | CAGCAGACTCAATACCTGGCA    | TACCGCCTTGTTTCAACAGC              | 133 bp        |
| <i>ef1a</i>      | CTGGAGGCCAGCTCAAACAT     | ATCAAGAAGAGTAGTACCGCTA<br>GCATTAC | 87 bp         |
| <i>ywhaz</i>     | TCTGCAATGATGTGTTGGAGC    | TCAATGGTTGCTTTCTTGTCGTC           | 151 bp        |
| <i>rpl13a</i>    | TCTGGAGGACTGTAAGAGGTATGC | AGACGCACAATCTTGAGAGCAG            | 148 bp        |

602

603

604 **Supplementary Figure 1. *dlx1a* and *dlx5a* expression and comparison with**  
605 **neurogenic areas in the adult zebrafish brain.**

606 Upper panel shows drawing of an adult brain sagittal section depicting neurogenic  
607 areas and zones with constitutive proliferation (adapted from Kizil C. *et al.*, 2011). [A-  
608 B] shows expression of *dlx1a* and *dlx5a* verified with ISH. Arrows indicate the main  
609 areas where expression of *dlx* genes matches areas with constitutive proliferation.  
610 These areas are: olfactory bulb (OB), ventral nucleus of ventral telencephalic area  
611 (Vv), parvocellular preoptic nucleus, anterior part (PPa), posterial zone of dorsal  
612 telencephalic area (Dp), periventricular nucleus of posterior tuberculum (TPp) and  
613 caudal zone of periventricular hypothalamus (Hc) and dorsal zone of periventricular  
614 hypothalamus (Hd).

615 Scale bar: 1mm

616

617 **Supplementary Figure 2. Co-expression of *dlx2a* and *dlx5a* with *gad65* in the**  
618 **adult zebrafish forebrain.**

619 Double fluorescence *in situ* hybridization with transverse sections of the forebrain  
620 with [A-D] expression of *dlx2a* and *dlx5a* in green along with anatomical parts  
621 indicated and [E-H] expression of *gad65* in red. [I-L] Co-localization of *dlx* and *gad65*  
622 in yellow. Merged images were created with ImageJ(32) software. (N=4 for *dlx2a* and  
623 *dlx5a*; N=3 for *dlx1a* and *dlx6a*).

624 Scale bar: 50µm

625

## 626 **Acknowledgements**

627 We would like to thank Yuchen Luo for contributions to some of the experiments,  
628 Vishal Saxena and Gary Hatch for technical support and also Dr. Marie-Andree  
629 Akimenko for discussions and suggestions.

630

## 631 **Author Contributions**

632 Conceptualization of the study and design of experiments: HWM and ME.  
633 Experiments and data analysis: HWM, MT and TD. Writing of original draft: HWM.  
634 Reviewing and editing: MT, TD and ME. Funding acquisition and resources: ME.

635

## 636 **Funding**

637 This research was supported by grants from the Natural Sciences and Engineering  
638 Research Council of Canada (grant # 121795) and by the Canadian Institutes of  
639 Health Research (grant # MOP-137082). We, the authors, declare no competing  
640 interests.

641

## 642 **References**

643

- 644 1. PANGANIBAN G, RUBENSTEIN JLR. Developmental functions of the Distal-  
645 less/Dlx homeobox genes. *Development*. [cited 2014 Oct 25];129(19):4371–  
646 86. Available from: <http://cat.inist.fr/?aModele=afficheN&cpsidt=13960388>
- 647 2. Anderson SA, Eisenstat DD, Shi L, Rubenstein JL. Interneuron Migration from  
648 Basal Forebrain to Neocortex: Dependence on Dlx Genes. *Science*.  
649 1997;278(October):474–6.
- 650 3. Pleasure SJ, Anderson S, Hevner R, Bagri A, Marin O, Lowenstein DH, et al.  
651 Cell migration from the ganglionic eminences is required for the development  
652 of hippocampal GABAergic interneurons. *Neuron*. 2000;28:727–40.
- 653 4. Panganiban G, Rubenstein JLR. Developmental functions of the Distal-  
654 less/Dlx homeobox genes. *Development*. 2002;129(19):4371–86. Available  
655 from: <http://www.ncbi.nlm.nih.gov/pubmed/12223397>
- 656 5. Anderson S a., Qiu M, Bulfone A, Eisenstat DD, Meneses J, Pedersen R, et al.  
657 Mutations of the homeobox genes Dlx-1 and Dlx-2 disrupt the striatal  
658 subventricular zone and differentiation of late born striatal neurons. *Neuron*.  
659 1997;19:27–37.
- 660 6. Akimenko M a, Ekker M, Wegner J, Lin W, Westerfield M. Combinatorial  
661 expression of three zebrafish genes related to distal-less: part of a homeobox  
662 gene code for the head. *J Neurosci*. 1994;14(June):3475–86. Available from:  
663 <papers2://publication/uuid/C1363F70-1F71-4DFF-89FC-50B55FF8105E>
- 664 7. Ellies DL, Stock DW, Hatch G, Giroux G, Weiss KM, Ekker M. Relationship  
665 between the genomic organization and the overlapping embryonic expression  
666 patterns of the zebrafish dlx genes. *Genomics*. 1997;45(3):580–90.

- 667 8. MacDonald RB, Pollack JN, Debiais-Thibaud M, Heude E, Talbot JC, Ekker M.  
668 The *ascl1a* and *dlx* genes have a regulatory role in the development of  
669 GABAergic interneurons in the zebrafish diencephalon. *Dev Biol*. 2013 Sep 1  
670 [cited 2014 Oct 11];381(1):276–85. Available from:  
671 <http://www.pubmedcentral.nih.gov/articlerender.fcgi?artid=3750962&tool=pmc>  
672 [entrez&rendertype=abstract](https://pubmed.ncbi.nlm.nih.gov/24111111/)
- 673 9. Zerucha T, Ekker M. Distal-less-related homeobox genes of vertebrates:  
674 Evolution, function, and regulation. *Biochem Cell Biol*. 2000;78(5):593–601.
- 675 10. Sumiyama K, Irvine SQ, Ruddle FH. The role of gene duplication in the  
676 evolution and function of the vertebrate *Dlx*/distal-less bigene clusters. *J Struct*  
677 *Funct Genomics*. 2003;3(1–4):151–9.
- 678 11. Ghanem N, Jarinova O, Amores A, Long Q, Hatch G, Park BK, et al.  
679 Regulatory roles of conserved intergenic domains in vertebrate *Dlx* bigene  
680 clusters. *Genome Res*. 2003;13:533–43.
- 681 12. Fazel Darbandi S, Poitras L, Monis S, Lindtner S, Yu M, Hatch G, et al.  
682 Functional consequences of *I56ii* *Dlx* enhancer deletion in the developing  
683 mouse forebrain. *Dev Biol*. 2016;420(1):32–42.
- 684 13. Zerucha T, Stühmer T, Hatch G, Park BK, Long Q, Yu G, et al. A highly  
685 conserved enhancer in the *Dlx5/Dlx6* intergenic region is the site of cross-  
686 regulatory interactions between *Dlx* genes in the embryonic forebrain. *J*  
687 *Neurosci*. 2000;20(2):709–21.
- 688 14. Solek CM, Feng S, Perin S, Weinschutz Mendes H, Ekker M. Lineage tracing  
689 of *dlx1a/2a* and *dlx5a/6a* expressing cells in the developing zebrafish brain.  
690 *Dev Biol*. 2017;(October 2016). Available from:  
691 <http://linkinghub.elsevier.com/retrieve/pii/S0012160616306303>
- 692 15. Adolf B, Chapouton P, Lam CS, Topp S, Tannhäuser B, Strähle U, et al.

- 693 Conserved and acquired features of adult neurogenesis in the zebrafish  
694 telencephalon. *Dev Biol.* 2006;295(1):278–93.
- 695 16. Becker CG, Becker T. Adult zebrafish as a model for successful central  
696 nervous system regeneration. *Restor Neurol Neurosci.* 2008;26(2-3 AXONAL  
697 REGENERATO):71–80.
- 698 17. Kizil C, Kaslin J, Kroehne V, Brand M. Adult neurogenesis and brain  
699 regeneration in zebrafish. *Dev Neurobiol.* 2012;72:429–61.
- 700 18. Schmidt R, Strähle U, Scholpp S. Neurogenesis in zebrafish - from embryo to  
701 adult. *Neural Dev.* 2013;8:3. Available from:  
702 <http://www.pubmedcentral.nih.gov/articlerender.fcgi?artid=3598338&tool=pmc>  
703 [entrez&rendertype=abstract](http://www.pubmedcentral.nih.gov/articlerender.fcgi?artid=3598338&tool=pmc)
- 704 19. Zupanc GKH, Ott R. Cell proliferation after lesions in the cerebellum of adult  
705 teleost fish: Time course, origin, and type of new cells produced. *Exp Neurol.*  
706 1999;160(1):78–87.
- 707 20. Grandel H, Kaslin J, Ganz J, Wenzel I, Brand M. Neural stem cells and  
708 neurogenesis in the adult zebrafish brain: Origin, proliferation dynamics,  
709 migration and cell fate. *Dev Biol.* 2006;295(1):263–77.
- 710 21. Kaslin J, Ganz J, Brand M. Proliferation, neurogenesis and regeneration in the  
711 non-mammalian vertebrate brain. *Philos Trans R Soc B Biol Sci.*  
712 2008;363(1489):101–22.
- 713 22. Yu M, Xi Y, Pollack J, Debais-Thibaud M, MacDonald RB, Ekker M. Activity of  
714 *dlx5a/dlx6a* regulatory elements during zebrafish GABAergic neuron  
715 development. *Int J Dev Neurosci.* 2011;29(7):681–91. Available from:  
716 <http://dx.doi.org/10.1016/j.ijdevneu.2011.06.005>
- 717 23. Eisenstat DD, Liu JK, Mione M, Zhong W, Yu G, Anderson SA, et al. DLX-1,  
718 DLX-2, and DLX-5 expression define distinct stages of basal forebrain

- 719 differentiation. *J Comp Neurol.* 1999;414(2):217–37.
- 720 24. Schmidt R, Beil T, Strähle U, Rastegar S. Stab Wound Injury of the Zebrafish  
721 Adult Telencephalon: A Method to Investigate Vertebrate Brain Neurogenesis  
722 and Regeneration. *J Vis Exp.* 2014;(August):e51753. Available from:  
723 [http://www.jove.com/video/51753/stab-wound-injury-zebrafish-adult-](http://www.jove.com/video/51753/stab-wound-injury-zebrafish-adult-telencephalon-method-to-investigate)  
724 [telencephalon-method-to-investigate](http://www.jove.com/video/51753/stab-wound-injury-zebrafish-adult-telencephalon-method-to-investigate)
- 725 25. Petryniak M a., Potter GB, Rowitch DH, Rubenstein JLR. Dlx1 and Dlx2  
726 Control Neuronal versus Oligodendroglial Cell Fate Acquisition in the  
727 Developing Forebrain. *Neuron.* 2007;55:417–33.
- 728 26. Castro DS, Martynoga B, Parras C, Ramesh V, Pacary E, Garcia LG, et al. A  
729 novel function of the proneural factor Ascl1 in progenitor proliferation identified  
730 by genome-wide characterization of its targets. 2011;930–45.
- 731 27. Saino-Saito S, Berlin R, Baker H. Dlx-1 and Dlx-2 Expression in the Adult  
732 Mouse Brain: Relationship to Dopaminergic Phenotypic Regulation. *J Comp*  
733 *Neurol.* 2003 [cited 2019 Aug 22];461:18–30. Available from:  
734 <https://onlinelibrary.wiley.com/doi/pdf/10.1002/cne.10611>
- 735 28. Brill MS, Snapyan M, Wohlfrom H, Ninkovic J, Jawerka M, Mastick GS, et al. A  
736 Dlx2- and Pax6-Dependent Transcriptional Code for Periglomerular Neuron  
737 Specification in the Adult Olfactory Bulb. 2008;28(25):6439–52.
- 738 29. Zhang X, Pol AN Van Den. Dopamine / Tyrosine Hydroxylase Neurons of the  
739 Hypothalamic Arcuate Nucleus Release GABA , Communicate with  
740 Dopaminergic and Other Arcuate Neurons , and Respond to Dynorphin , Met-  
741 Enkephalin , and Oxytocin. 2015;35(45):14966–82.
- 742 30. MacDonald RB, Debiais-Thibaud M, Talbot JC, Ekker M. The relationship  
743 between dlx and gad1 expression indicates highly conserved genetic  
744 pathways in the zebrafish forebrain. *Dev Dyn.* 2010;239(July):2298–306.

- 745 31. Defelipe J, López-cruz PL, Benavides-piccione R, Bielza C, Larrañaga P,  
746 Anderson S, et al. New insights into the classification and nomenclature of  
747 cortical GABAergic interneurons. 2014;14(3):202–16.
- 748 32. Ghanem N, Yu M, Long J, Hatch G, Rubenstein JL, Ekker M. Distinct cis-  
749 regulatory elements from the Dlx1/Dlx2 locus mark different progenitor cell  
750 populations in the ganglionic eminences and different subtypes of adult  
751 cortical interneurons. *J Neurosci*. 2007;27(19):5012–22. Available from:  
752 <http://www.ncbi.nlm.nih.gov/pubmed/17494687>
- 753 33. Nagpal J, Herget U, Choi MK, Ryu S. Anatomy, development, and plasticity of  
754 the neurosecretory hypothalamus in zebrafish. *Cell Tissue Res*.  
755 2019;375(1):5–22.
- 756 34. Machluf Y, Gutnick A, Levkowitz G. Development of the zebrafish  
757 hypothalamus. *Ann N Y Acad Sci*. 2011;1220(1):93–105.
- 758 35. Kyritsis N, Kizil C, Zocher S, Kroehne V, Kaslin J, Freudenreich D, et al. Acute  
759 Inflammation Initiates the Regenerative Response in the Adult Zebrafish Brain.  
760 *Science*. 2012; 338(6112):1353–6. Available from:  
761 <http://www.sciencemag.org/cgi/doi/10.1126/science.1228773>
- 762 36. Long Q, Meng A, Wang M, Jessen JR, Farrell MJ, Lin S. GATA-1 expression  
763 pattern can be recapitulated in living transgenic zebrafish using GFP reporter  
764 gene. *Development*. 1997;124(20):4105–11.
- 765 37. Endo T, Yoshino J, Kado K, Tochinai S. Brain regeneration in anuran  
766 amphibians. *Dev Growth Differ*. 2007;49(2):121–9.
- 767 38. Leker RR, Soldner F, Velasco I, Gavin DK, Androutsellis-Theotokis A, McKay  
768 RDG. Long-lasting regeneration after ischemia in the cerebral cortex. *Stroke*.  
769 2007;38(1):153–61.
- 770 39. Viales RR, Diotel N, Ferg M, Armant O, Eich J, Alunni A, et al. The helix-loop-

771 helix protein Id1 controls stem cell proliferation during regenerative  
772 neurogenesis in the adult zebrafish telencephalon. *Stem Cells*.  
773 2015;33(3):892–903.

774 40. Lam CS, Ma M, Stra U. gfap and nestin Reporter Lines Reveal Adult Zebrafish  
775 Brain. 2009;(January):475–86.

776 41. Kishimoto N, Shimizu K, Sawamoto K. Neuronal regeneration in a zebrafish  
777 model of adult brain injury. *Dis Model Mech*. 2012;5(2):200–9.

778



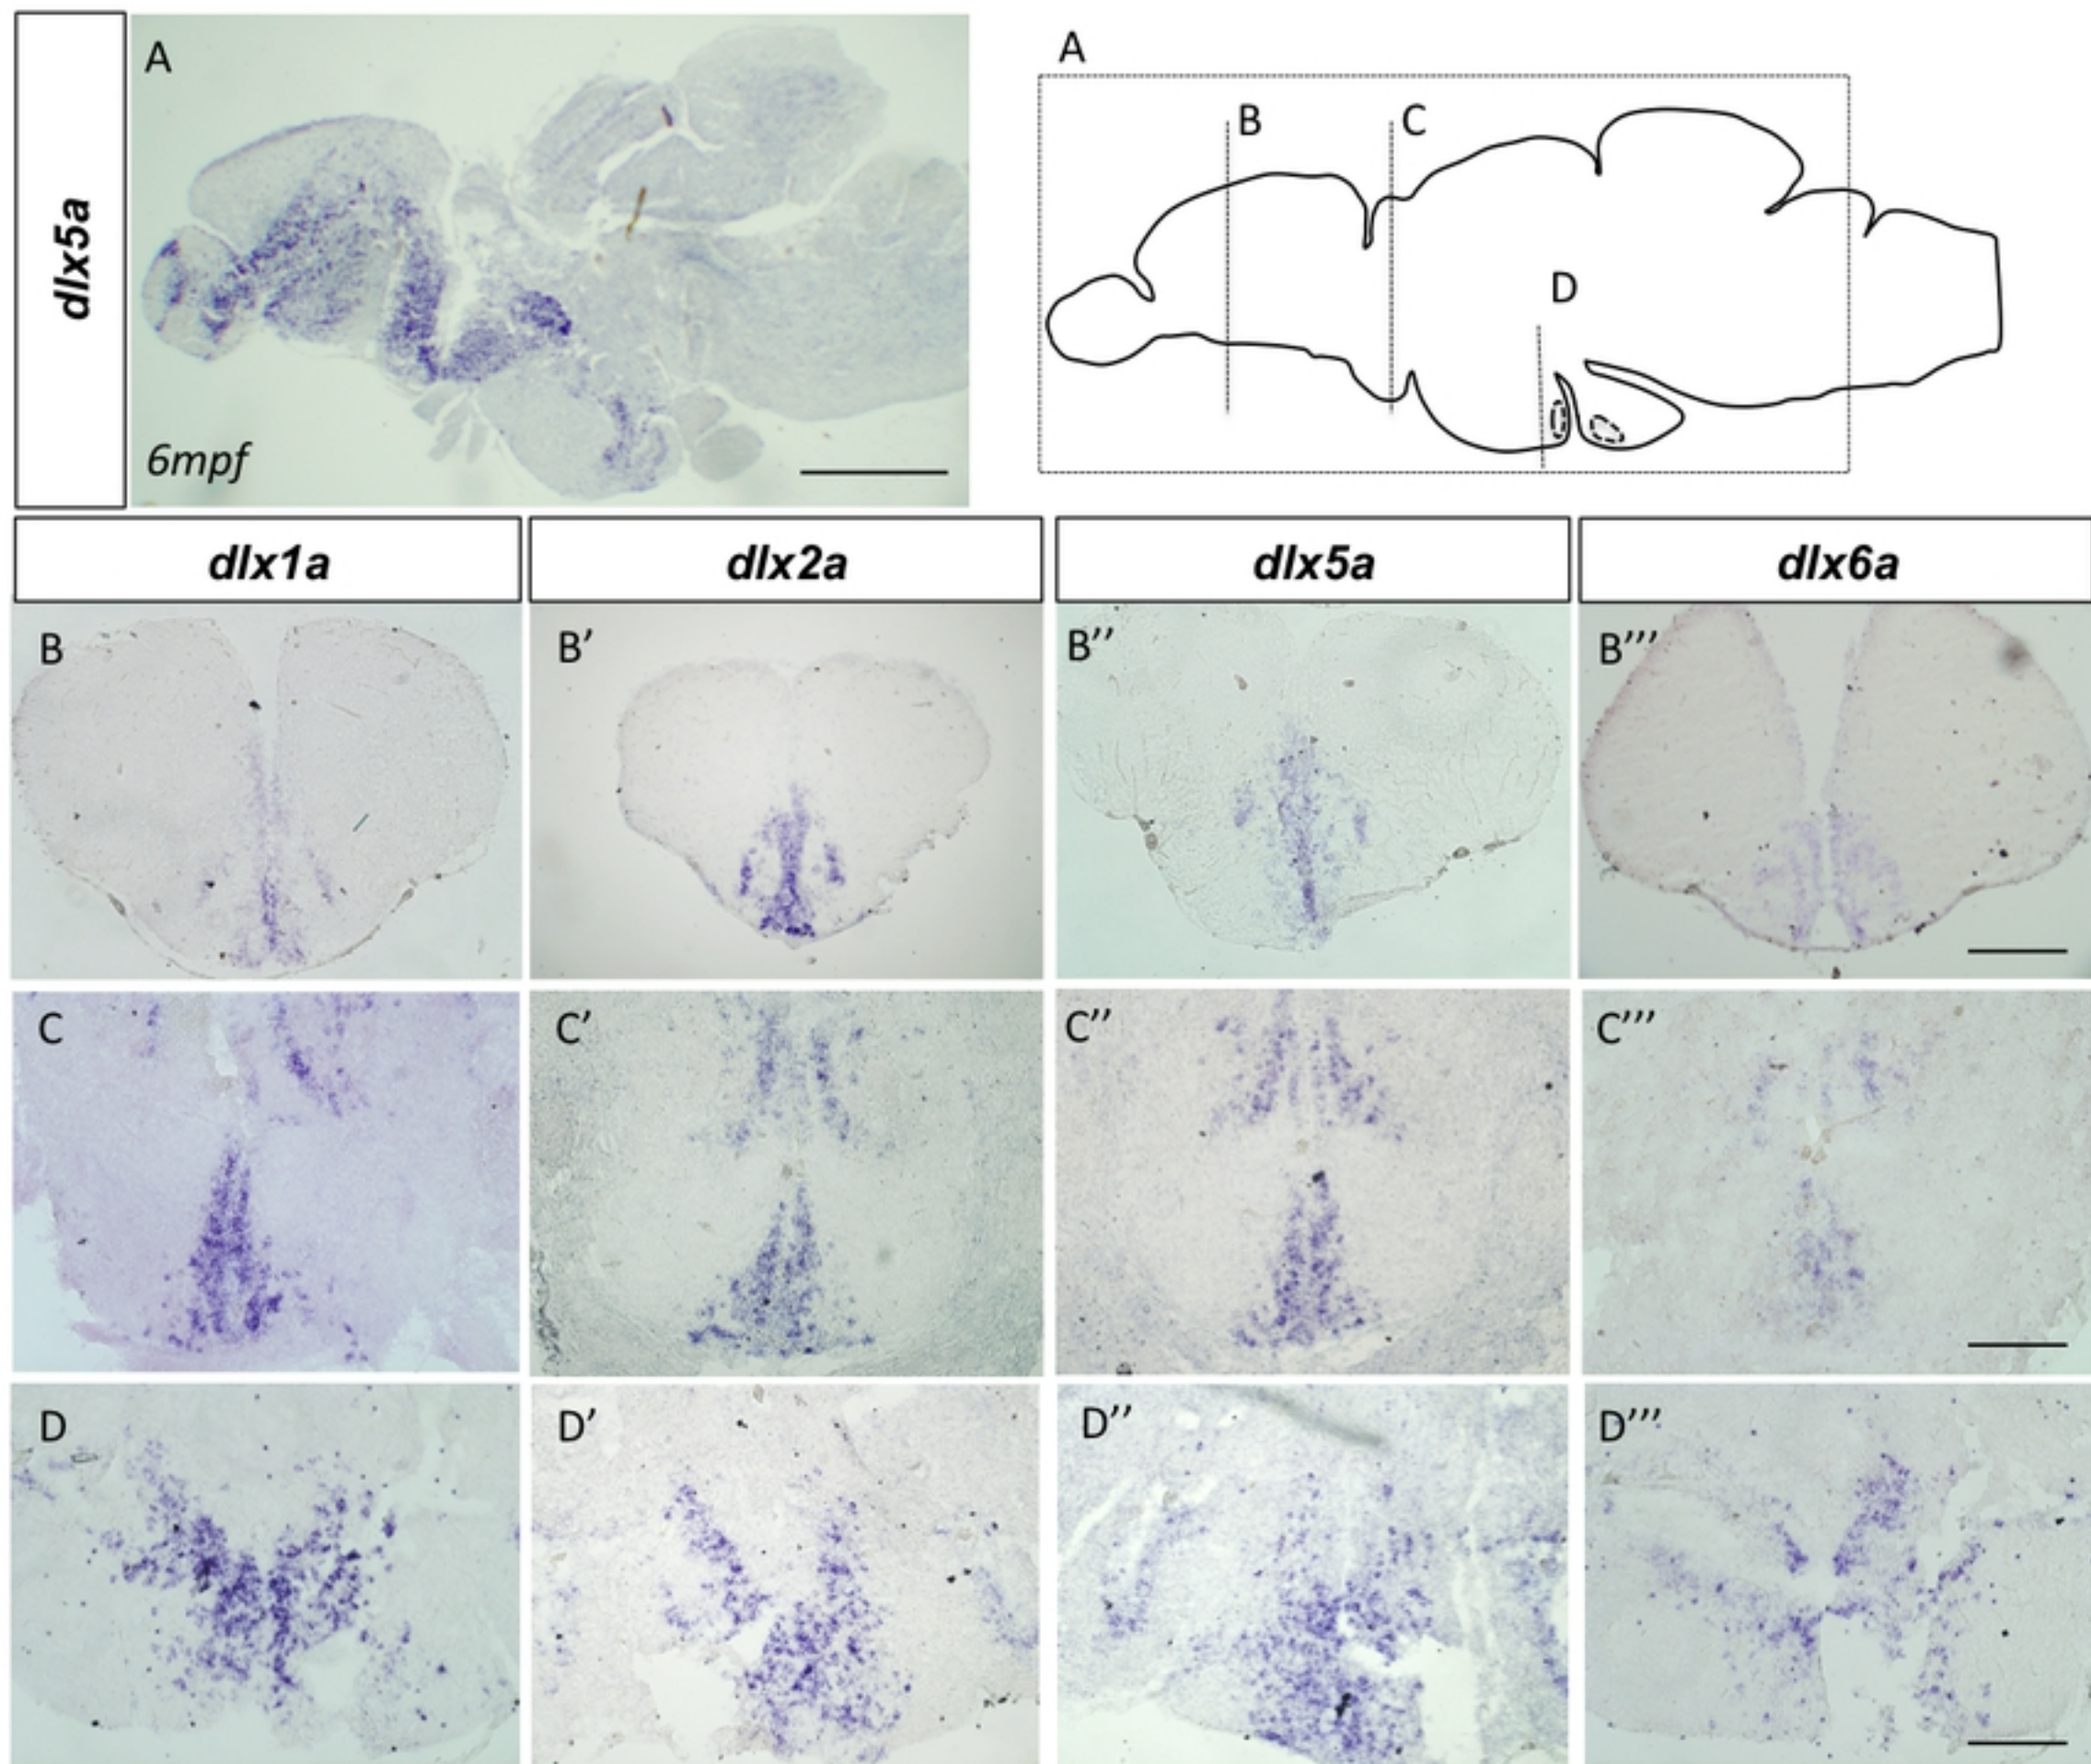

Figure 1

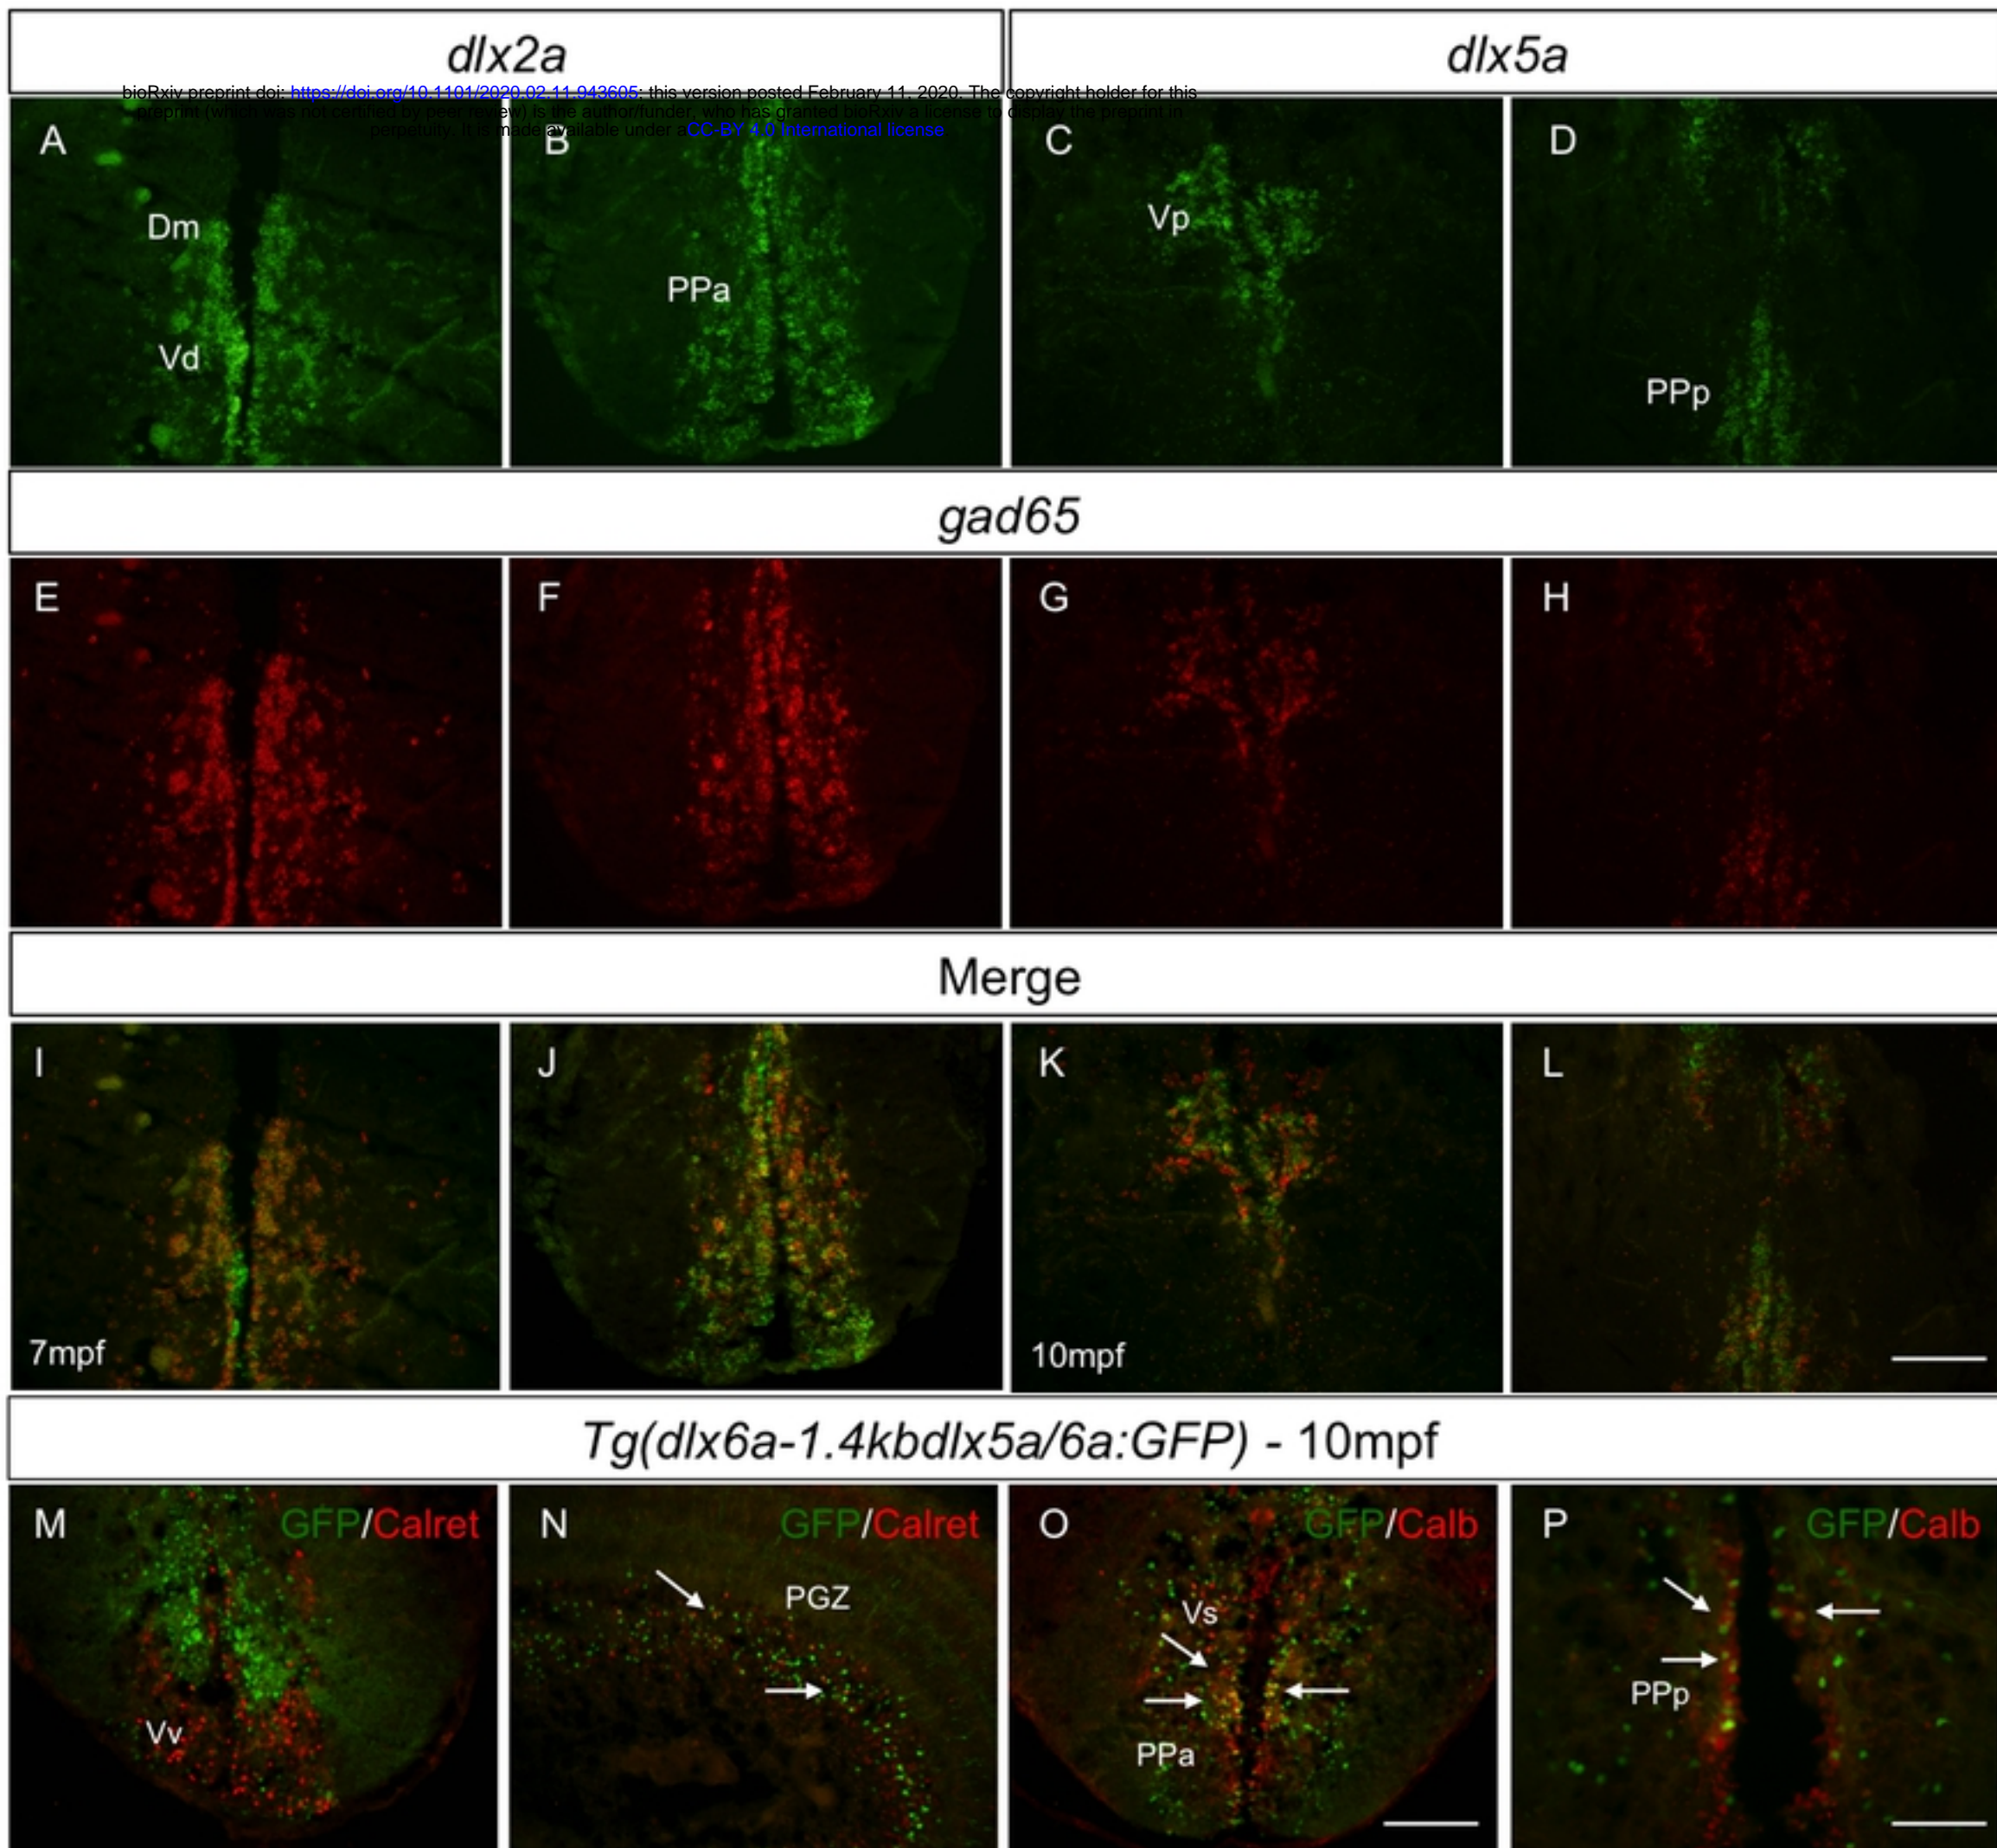

Figure2

*Tg(dlx6a-1.4kbdlx5a/6a:GFP)*

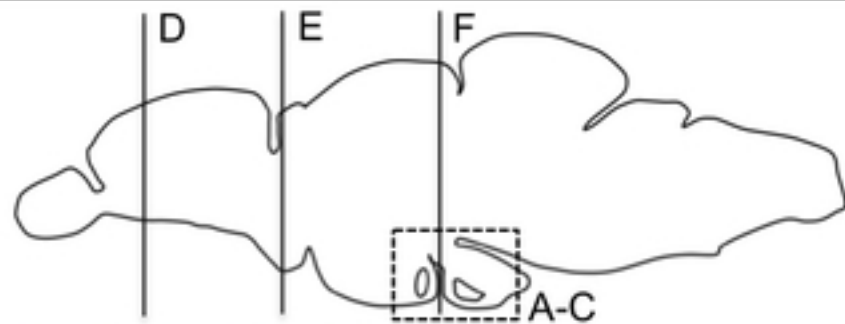

GFP / Sox2

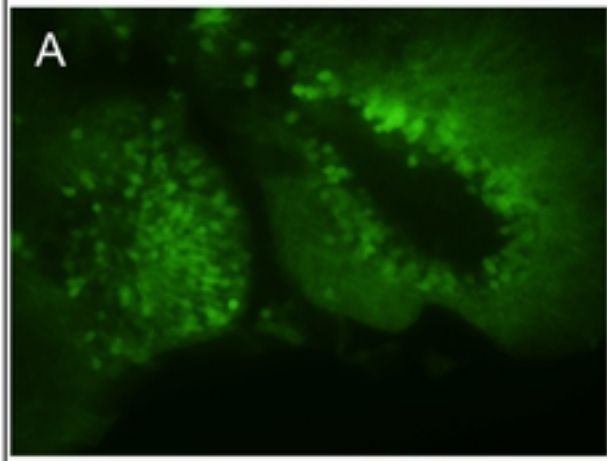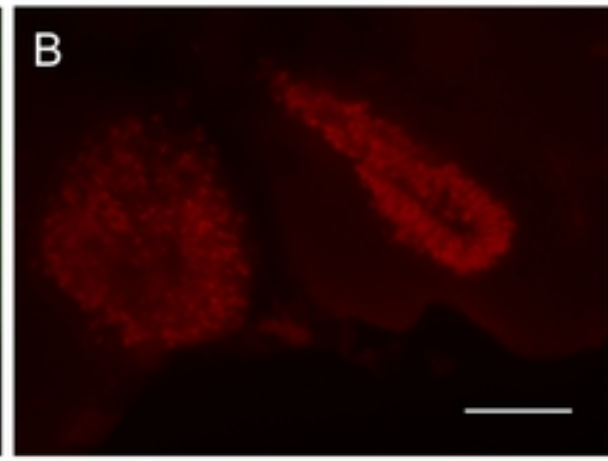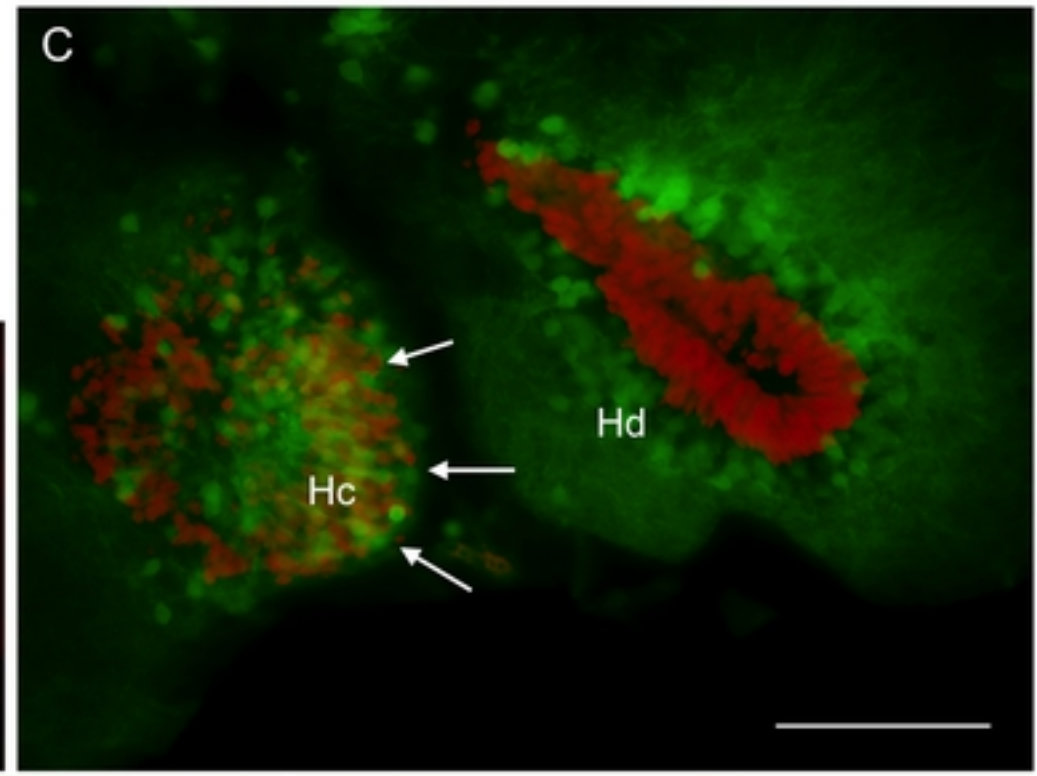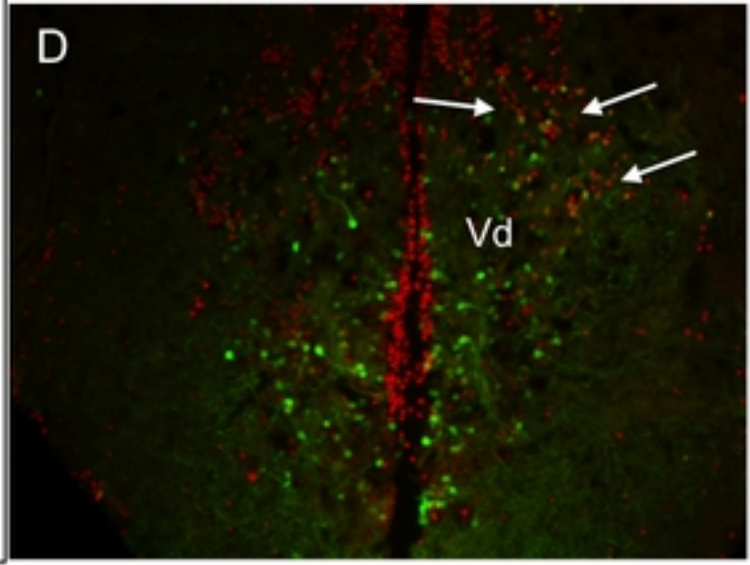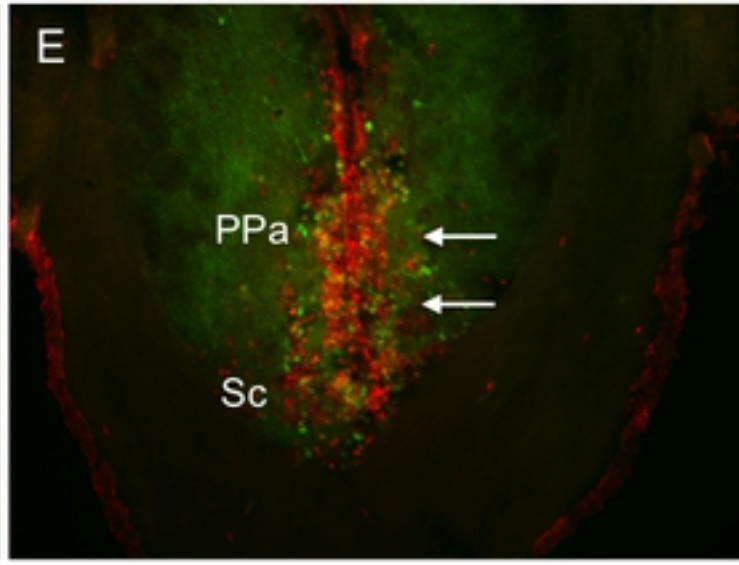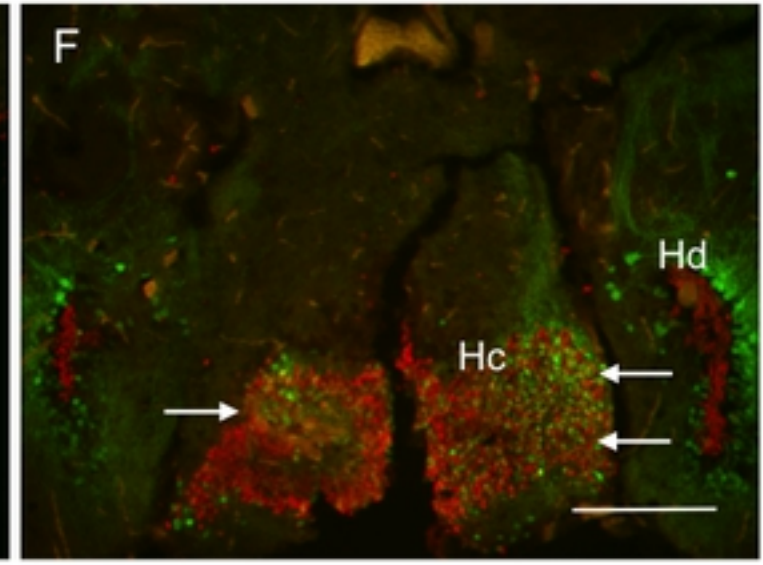

Figure3

*Tg(dlx6a-1.4kbdlx5a/6a:GFP)*

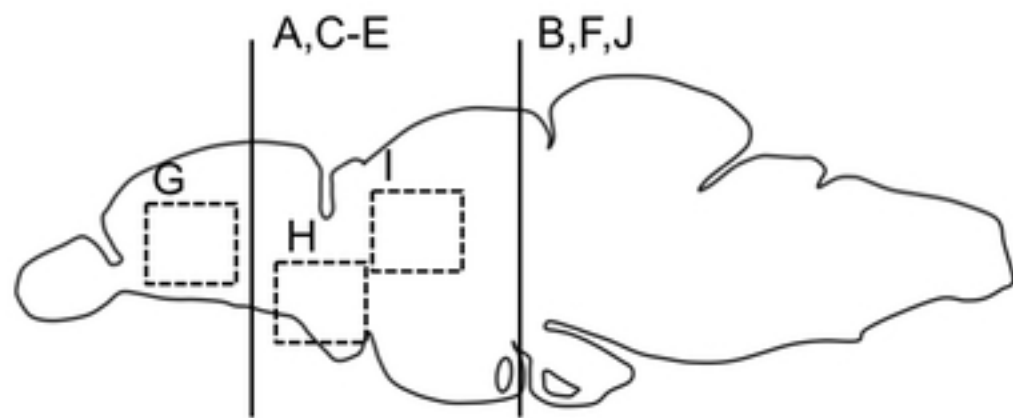

GFP / PCNA / DAPI

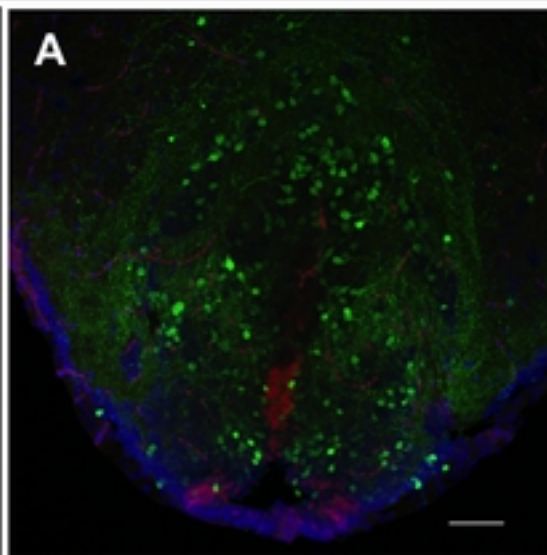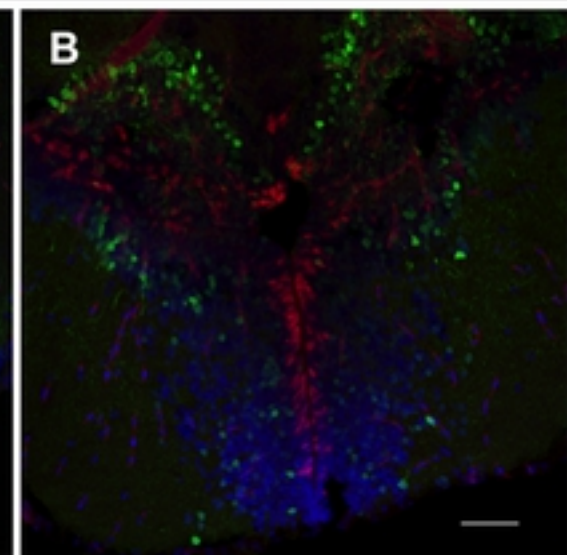

GFP / GFAP / DAPI

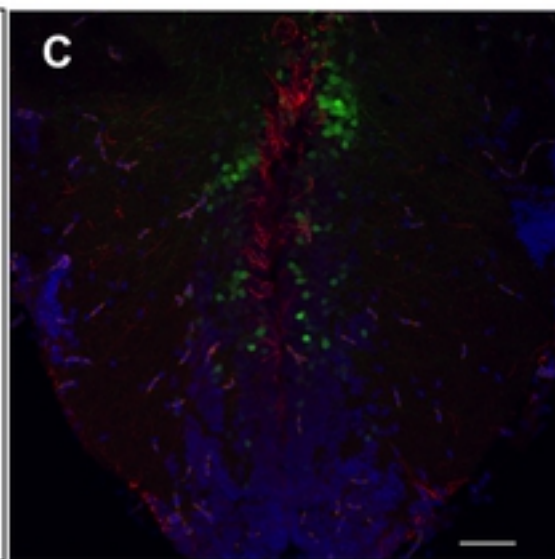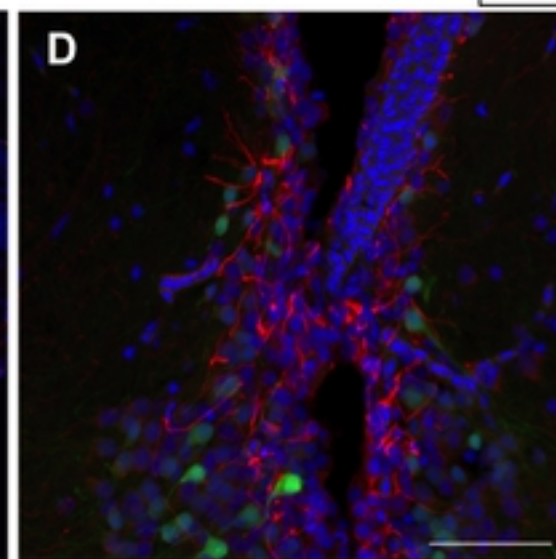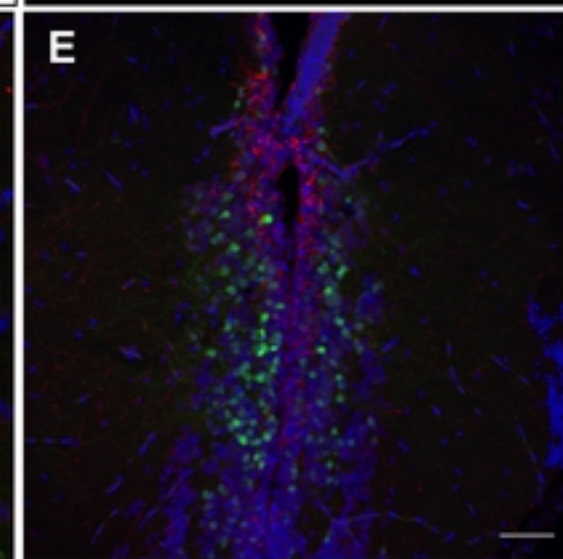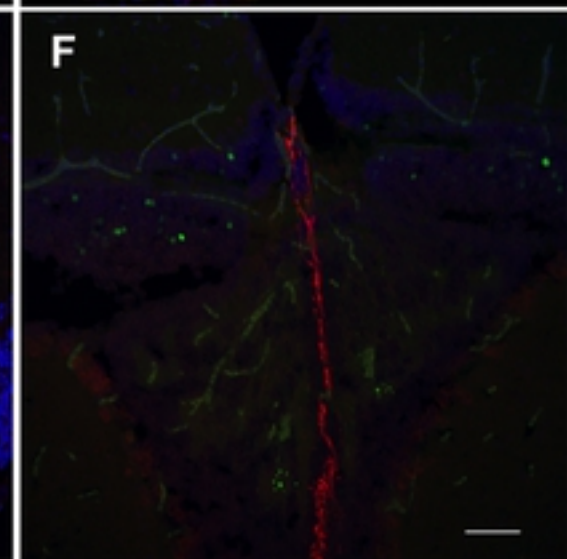

GFP / TH / DAPI

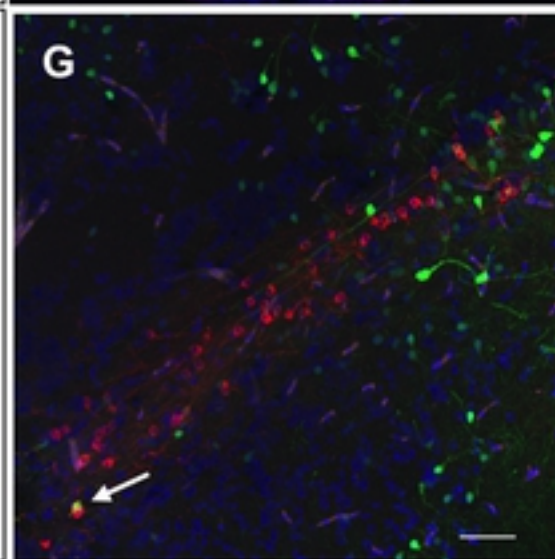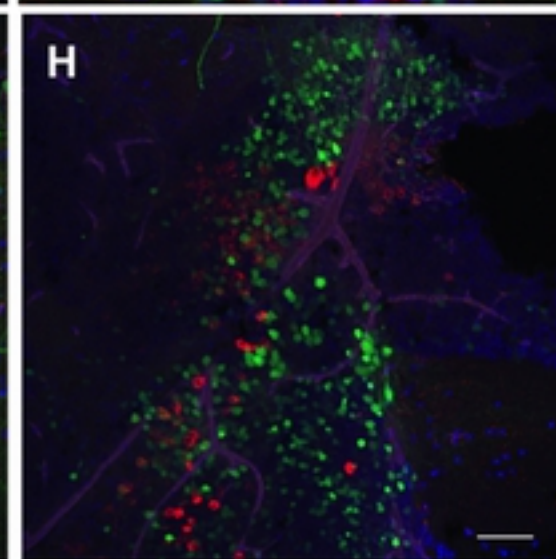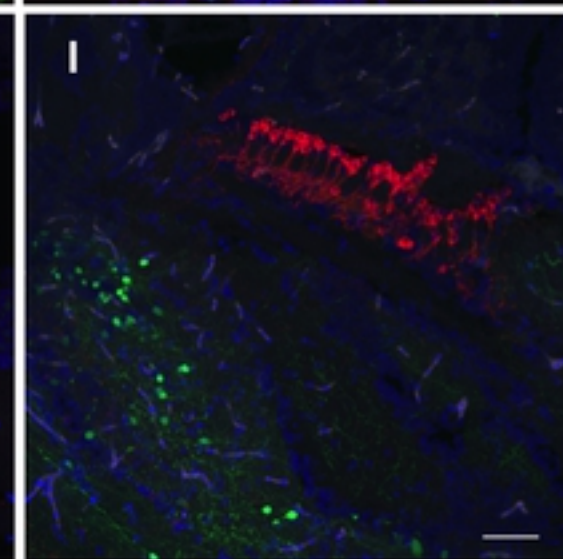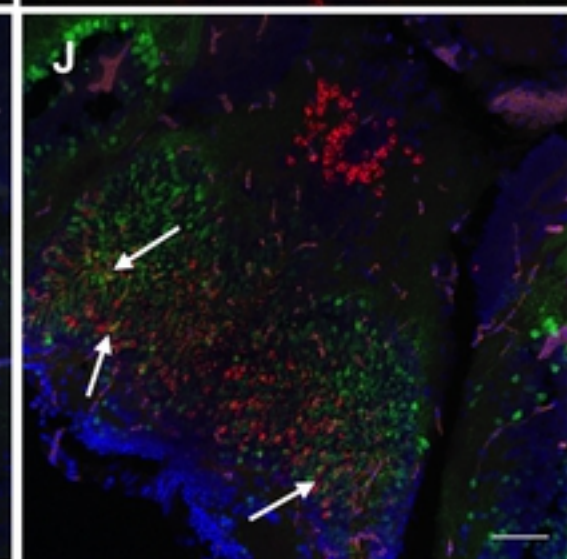

Figure4

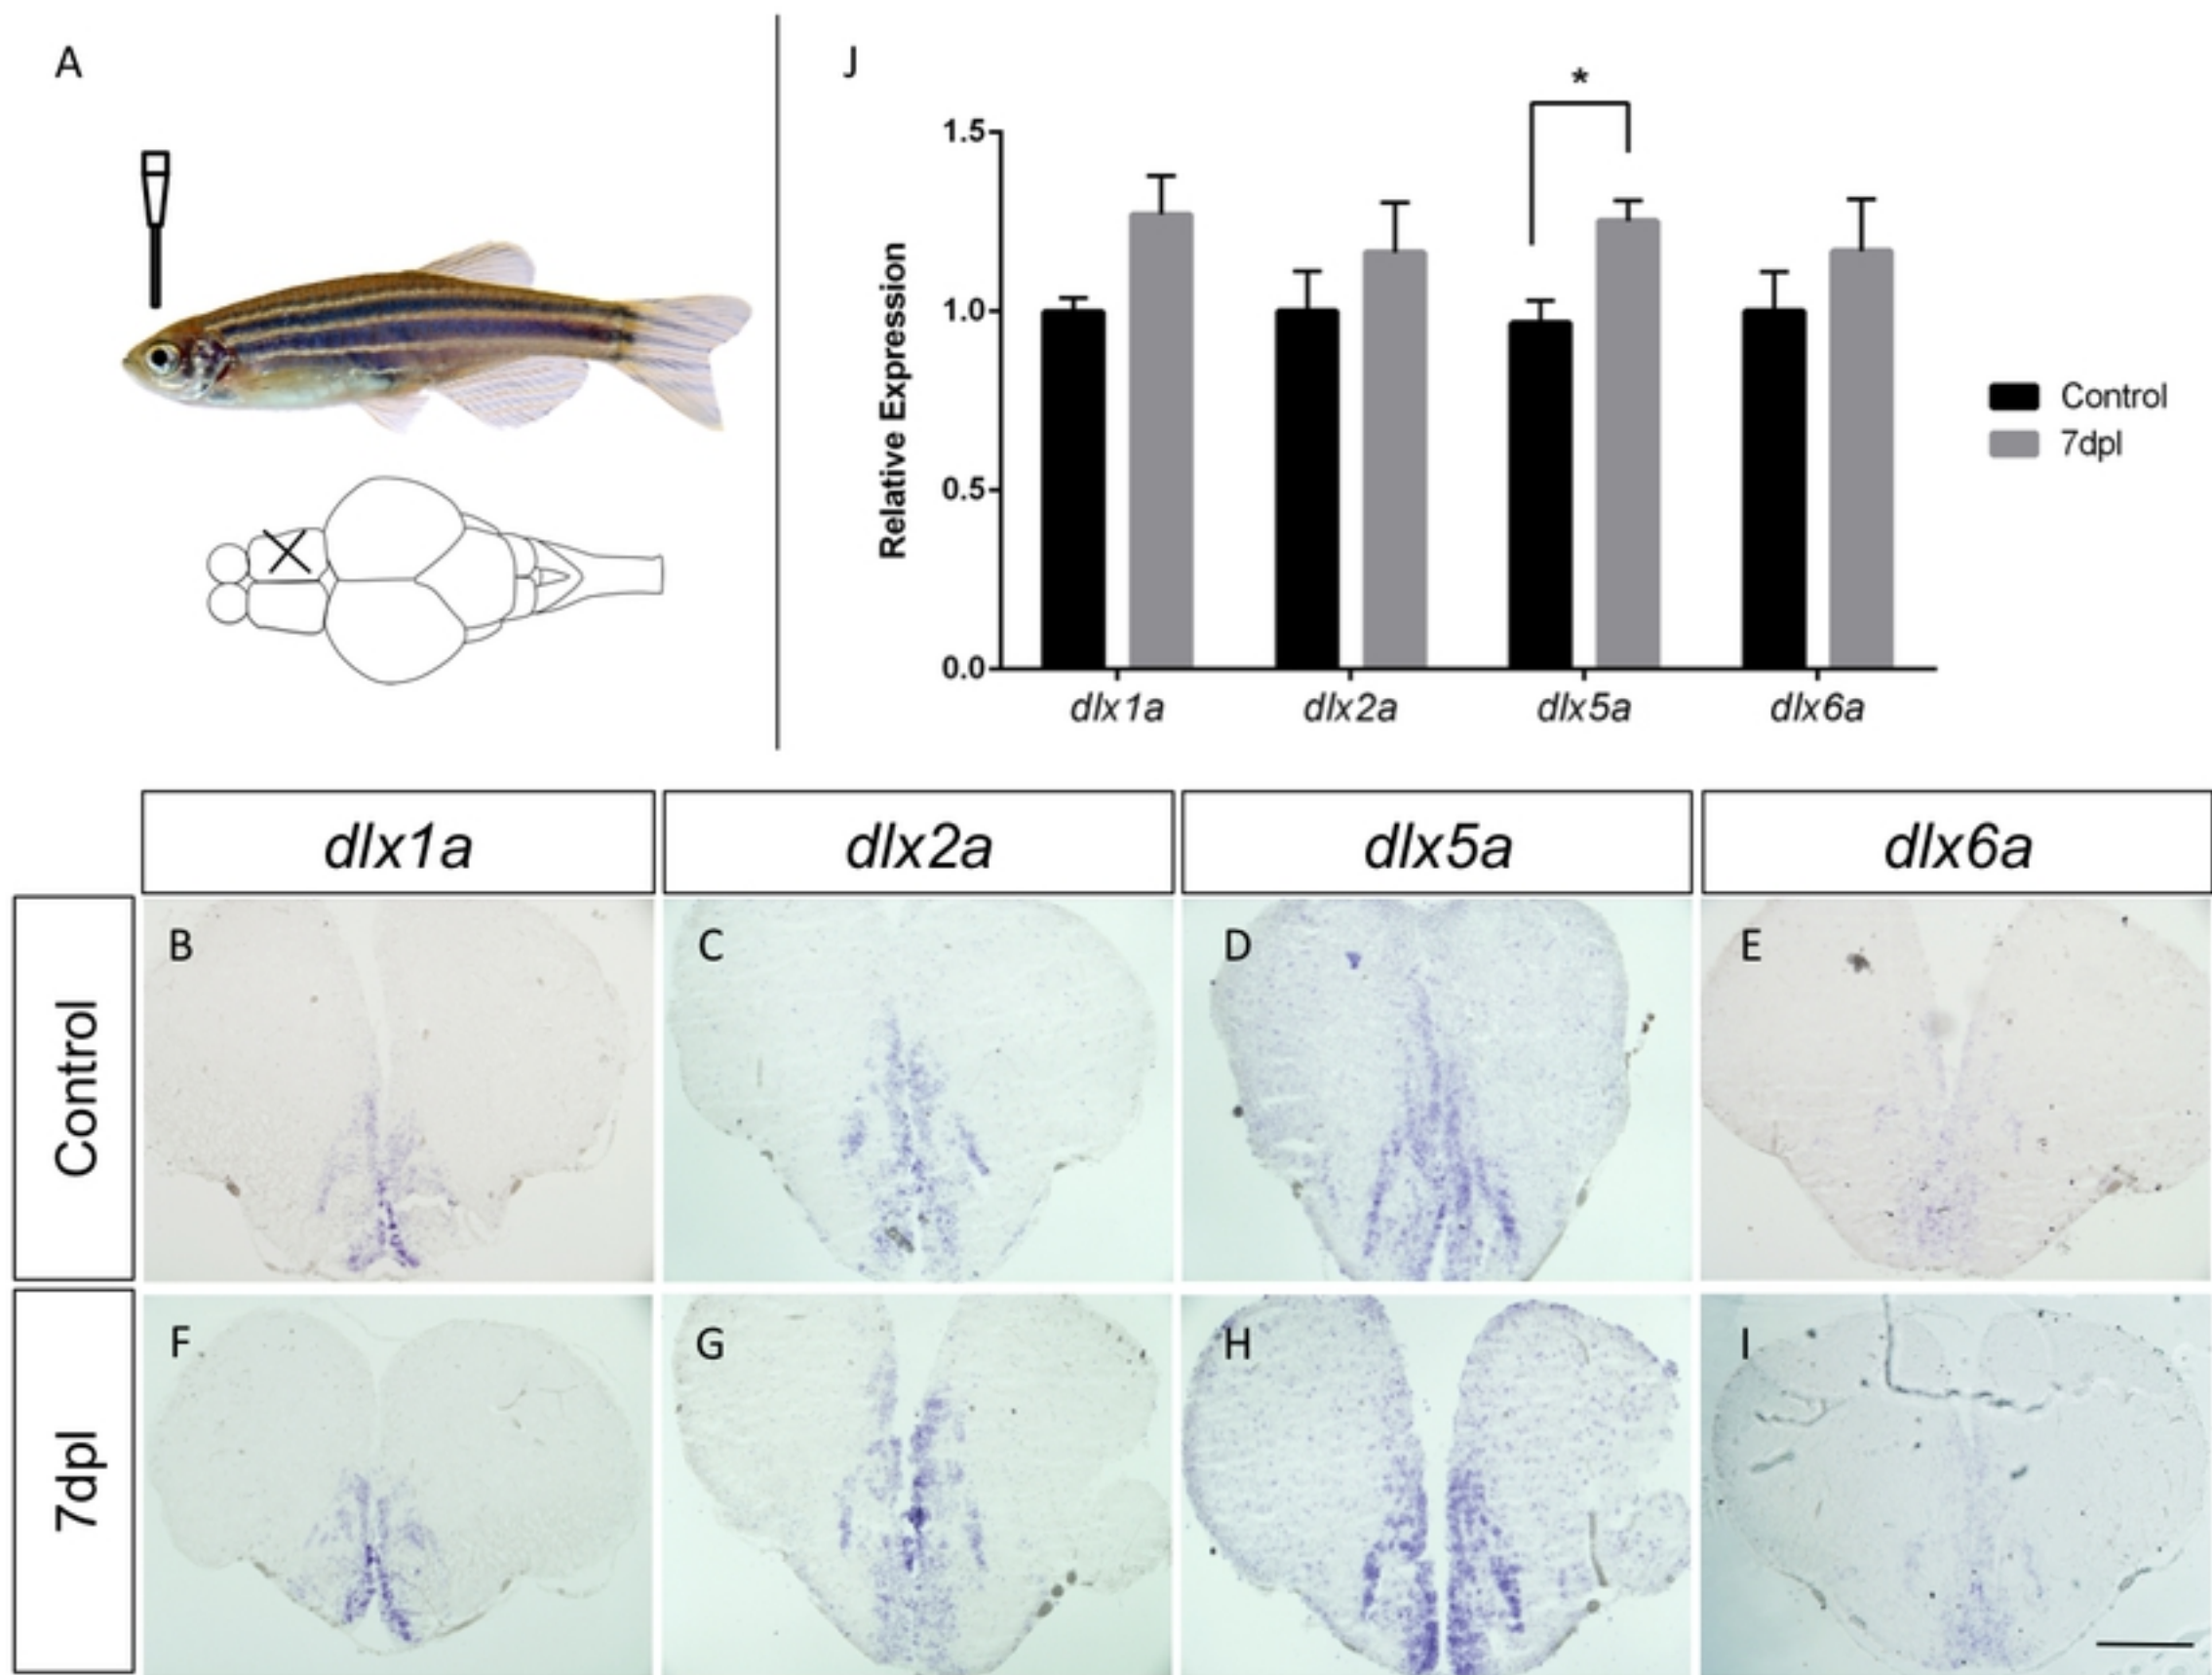

Figure 5

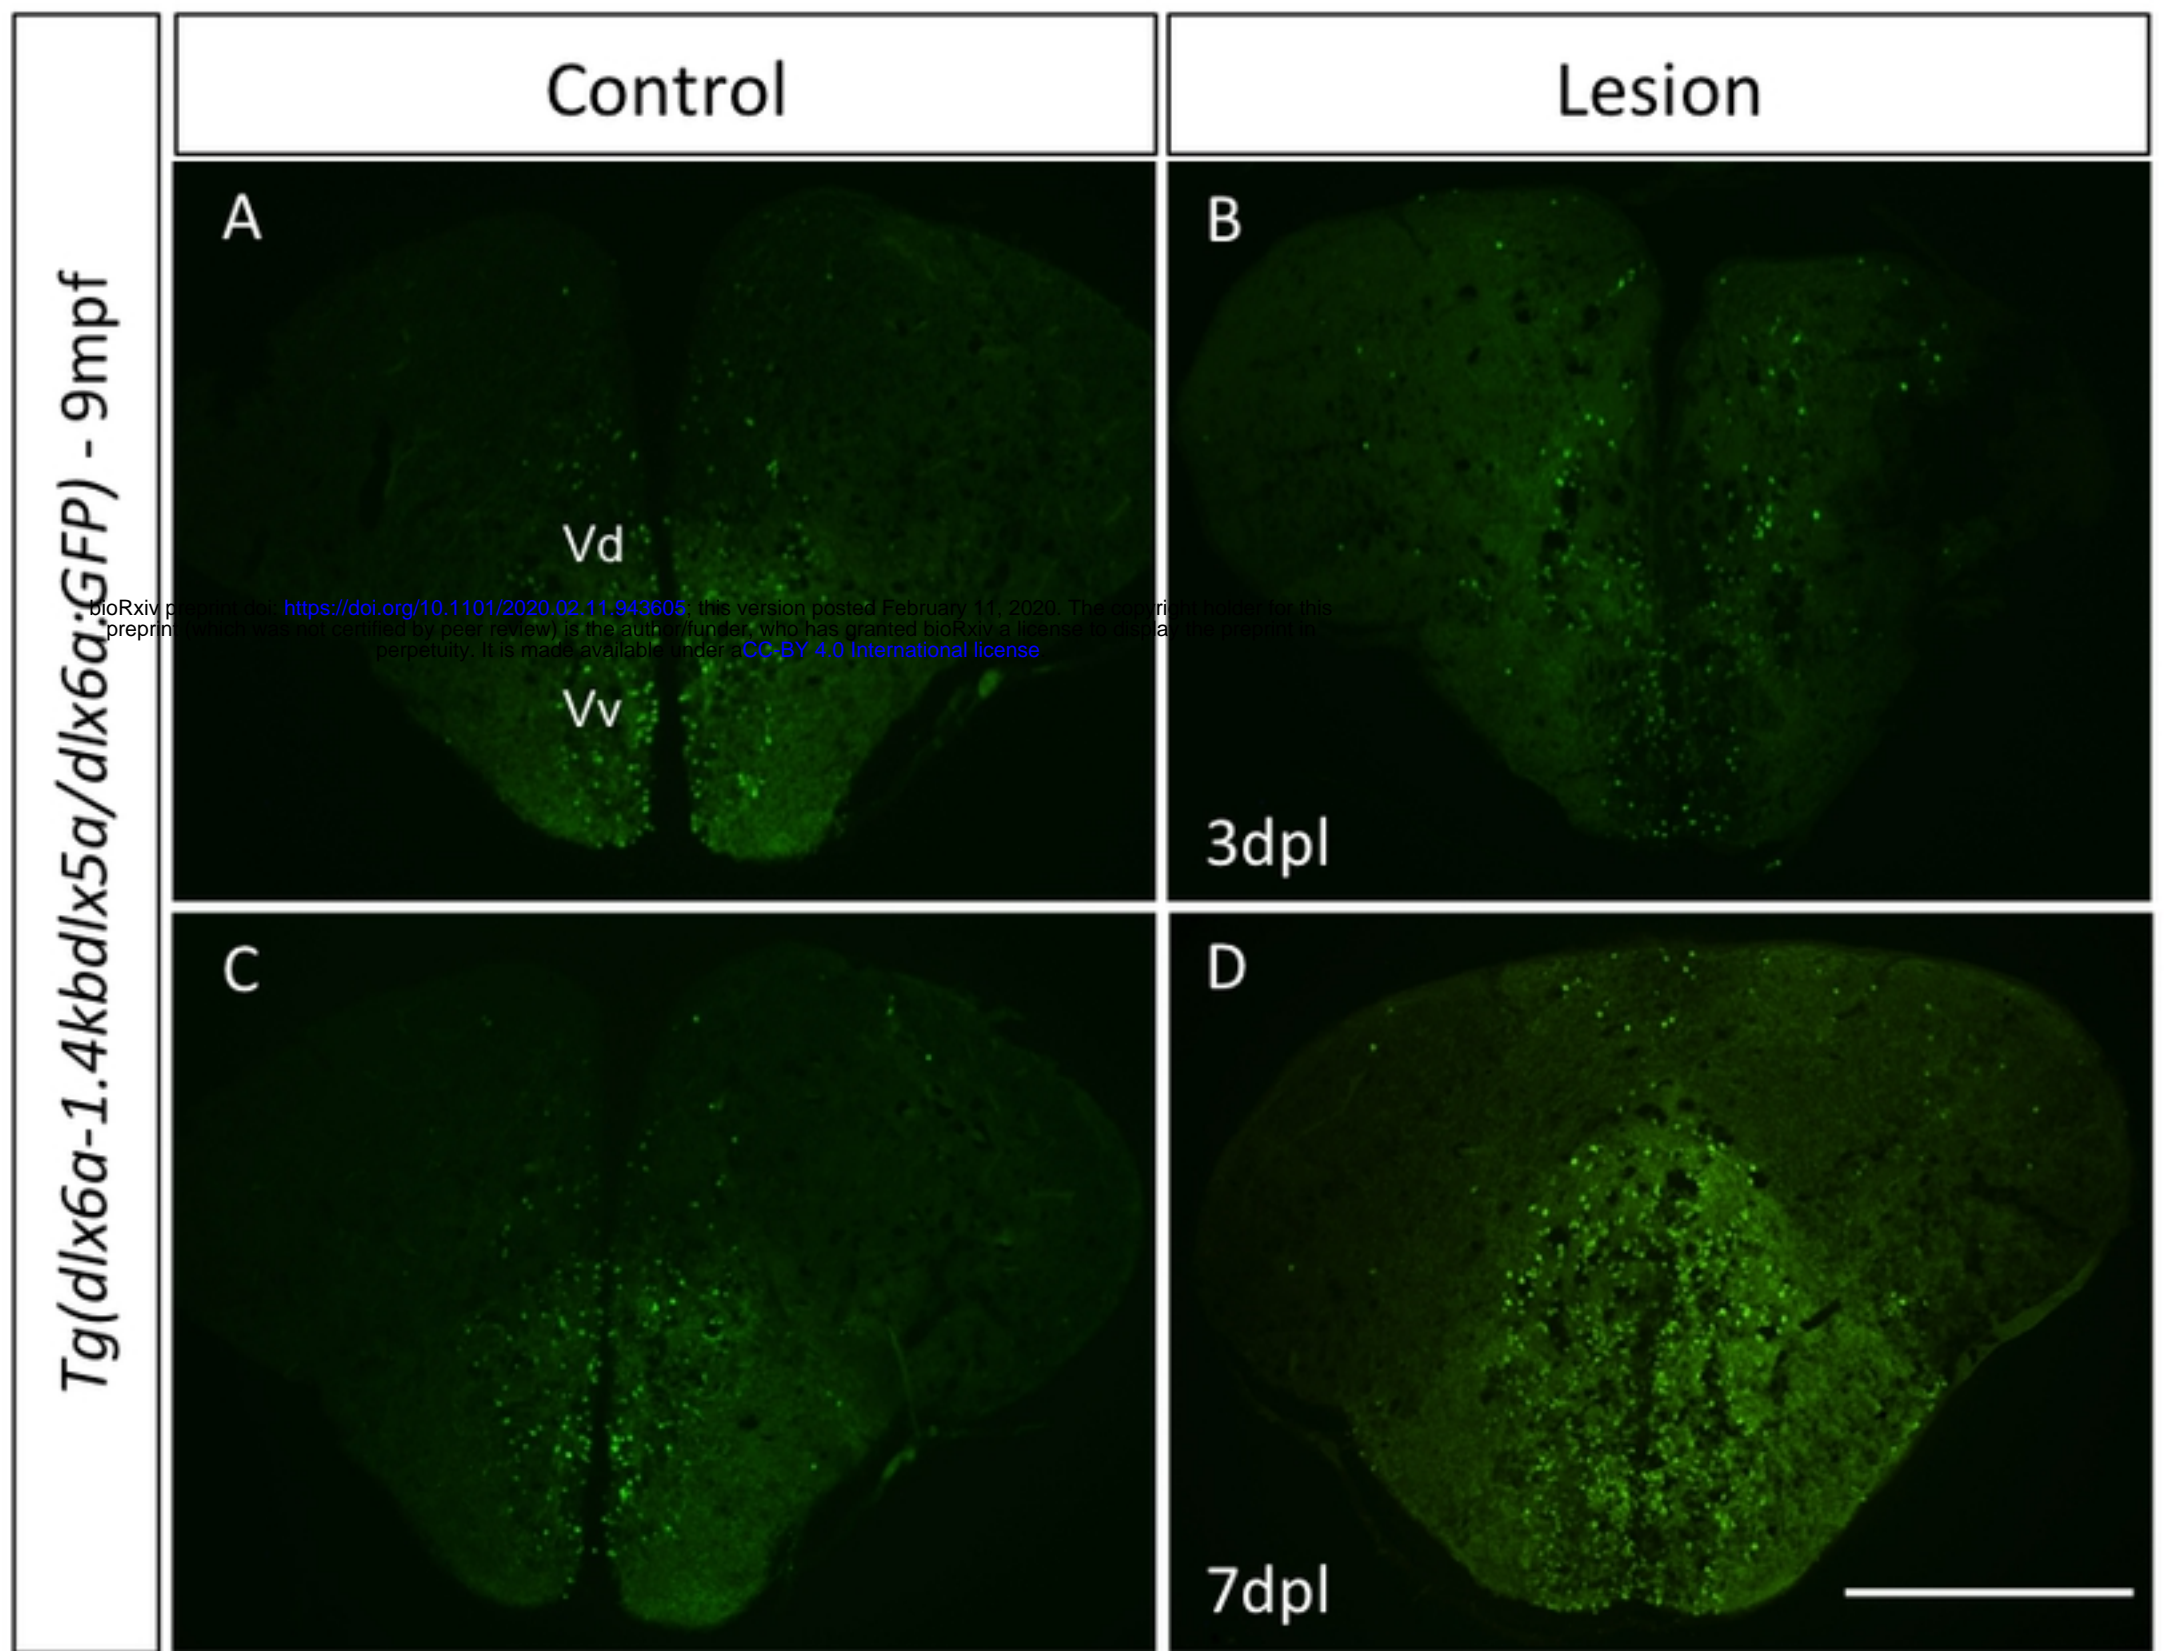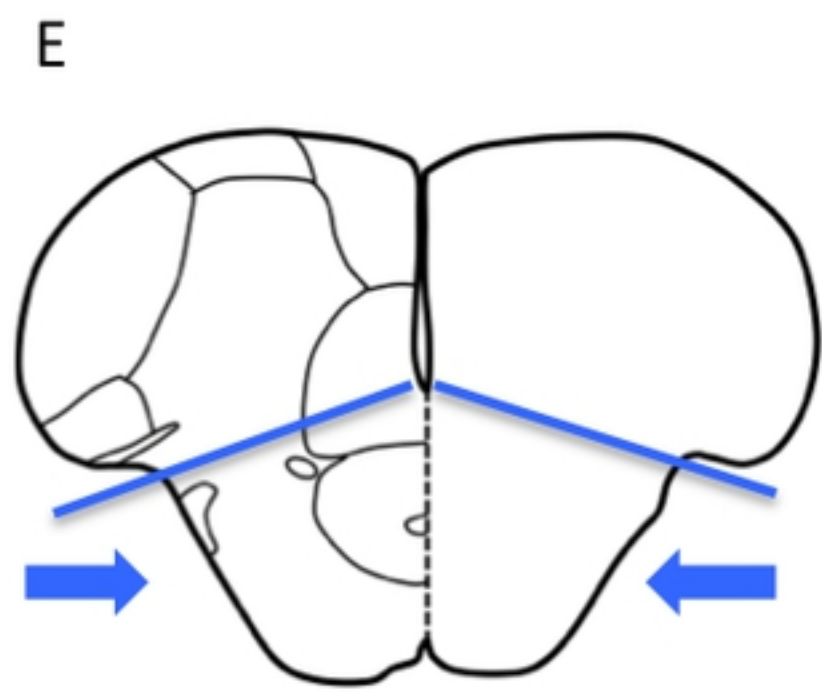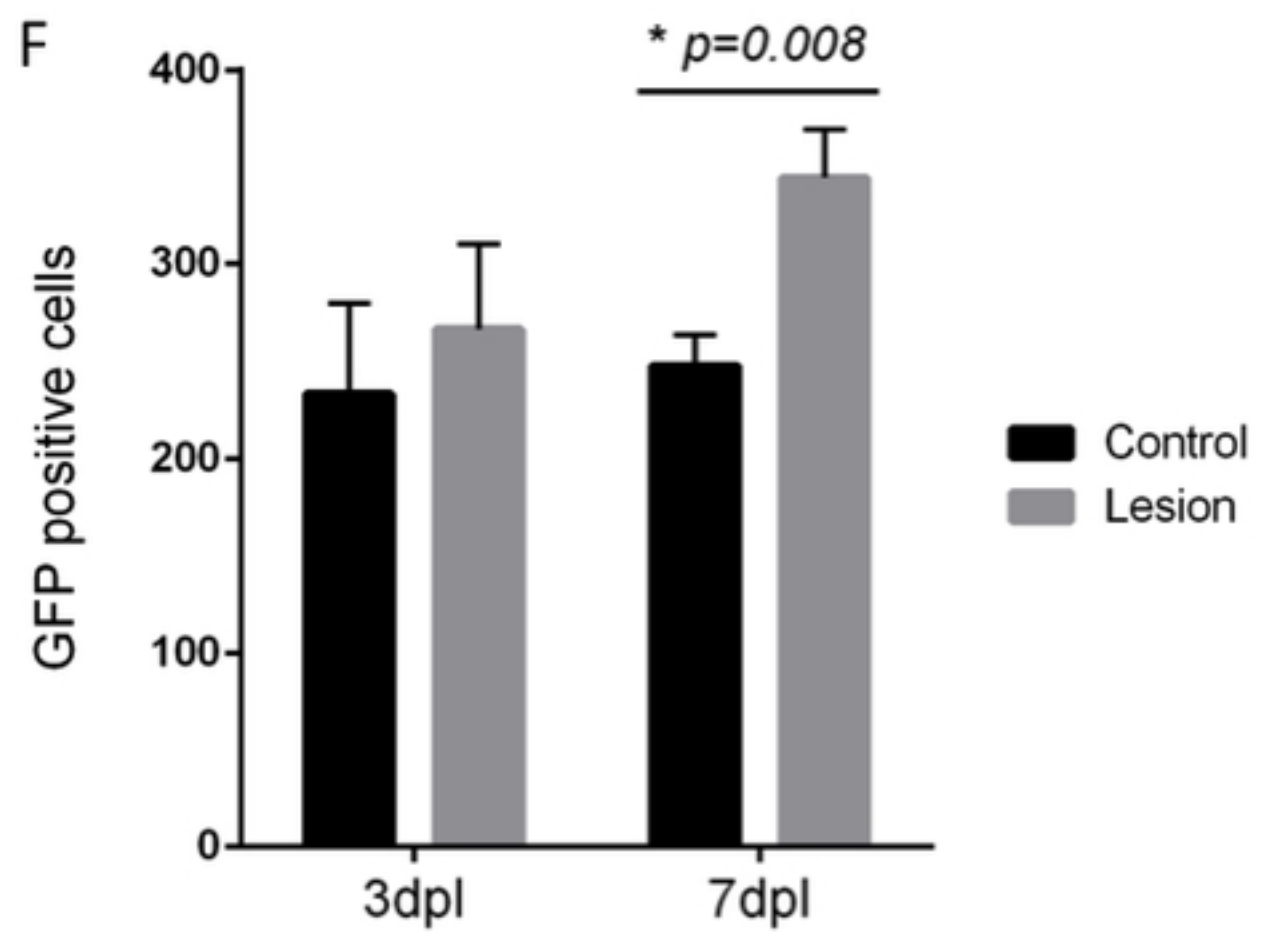

Figure6
